# Supplementary material for: Vacancy inter-layer migration in multi-layered graphene
Source: Royal Society of Chemistry journal article supplement (doi:10.1039/c4nr00488d), 2014-01-01
Supplement: c4nr00488d1.pdf [file c4nr00488d1.pdf]

# Electronic Supplementary Information for

  

# Vacancy Interlayer Migration in Multi-layered Graphene

**Lili Liu,<sup>a</sup> Junfeng Gao,<sup>b</sup> Xiuyun Zhang,<sup>b</sup> Tianying Yan<sup>c</sup> and Feng Ding <sup>a,b\*</sup>**

<sup>a</sup> Beijing Computational Science Research Center, Beijing 100084, Peoples Republic of China

<sup>b</sup> Institute of Textiles and Clothing, Hong Kong Polytechnic University, Kowloon, Hong Kong, Peoples Republic of China

<sup>c</sup> Institute of New Energy Material Chemistry, College of Chemistry, Nankai University, P. O. Box 300071, Tianjin, China

## Contents

1. The geometries of the cNEB calculations in Fig. 3.
2. The geometries of the evolution process in Fig. 4.
3. The total energy tables of the configurations in Fig. (table 1) and Fig. 4(table 2).

### **1. The geometries of the NEB calculations in Fig. 3.(direct coordinates).**

#### **The structures of the first set of the calculation in Fig. 3 (a)**

(1) The optimized initial1 geometry

119

Direct

|           |           |           |
|-----------|-----------|-----------|
| 0.2772970 | 0.0998140 | 0.5523270 |
| 0.1663615 | 0.1001506 | 0.5522895 |
| 0.0556611 | 0.1000080 | 0.3897870 |
| 0.1668928 | 0.1000072 | 0.3897929 |
| 0.6111719 | 0.0994131 | 0.5521674 |
| 0.5001017 | 0.0990641 | 0.5521992 |
| 0.3889920 | 0.1000096 | 0.3898102 |
| 0.5002196 | 0.1000096 | 0.3898510 |

|           |           |           |
|-----------|-----------|-----------|
| 0.9447454 | 0.1003152 | 0.5521858 |
| 0.8336500 | 0.1001575 | 0.5521375 |
| 0.7223140 | 0.1000109 | 0.3898450 |
| 0.8335698 | 0.1000065 | 0.3898345 |
| 0.9998429 | 0.2008870 | 0.5522382 |
| 0.0002195 | 0.2000032 | 0.3897385 |
| 0.2795319 | 0.3002652 | 0.5524556 |
| 0.1676898 | 0.3006792 | 0.5523838 |
| 0.0556404 | 0.3000032 | 0.3896102 |
| 0.1668660 | 0.3000053 | 0.3896187 |
| 0.1113462 | 0.2007647 | 0.5523302 |
| 0.2223166 | 0.2000137 | 0.3897106 |
| 0.3334228 | 0.1996752 | 0.5523518 |
| 0.3335627 | 0.2000253 | 0.3897768 |
| 0.6113261 | 0.2980195 | 0.5522850 |
| 0.5003569 | 0.2975528 | 0.5523546 |
| 0.3889926 | 0.3000176 | 0.3897914 |
| 0.5002108 | 0.3000163 | 0.3898811 |
| 0.4441001 | 0.1981503 | 0.5523167 |
| 0.5556467 | 0.2000203 | 0.3898386 |
| 0.6668656 | 0.1998032 | 0.5521891 |
| 0.6668900 | 0.1999849 | 0.3898229 |
| 0.9436280 | 0.3008997 | 0.5522844 |
| 0.8315585 | 0.3010513 | 0.5522401 |
| 0.7222981 | 0.3000040 | 0.3897781 |
| 0.8335080 | 0.3000021 | 0.3897356 |
| 0.7779883 | 0.2001107 | 0.5521827 |
| 0.8889726 | 0.1999833 | 0.3897521 |
| 0.9999159 | 0.4004463 | 0.5523389 |
| 0.0001669 | 0.4000068 | 0.3895703 |
| 0.1117736 | 0.4003033 | 0.5524080 |
| 0.2223091 | 0.4000186 | 0.3895216 |
| 0.3376081 | 0.4006619 | 0.5524988 |
| 0.3335281 | 0.4000280 | 0.3896910 |
| 0.4472112 | 0.3941165 | 0.5524364 |
| 0.5556169 | 0.4000105 | 0.3900035 |
| 0.6606708 | 0.4014393 | 0.5524507 |
| 0.6668163 | 0.3999928 | 0.3898841 |
| 0.7742591 | 0.4010495 | 0.5523727 |
| 0.8889421 | 0.4000016 | 0.3896286 |
| 0.2772970 | 0.9001860 | 0.5523270 |
| 0.1663615 | 0.8998494 | 0.5522895 |
| 0.0556611 | 0.8999920 | 0.3897870 |
| 0.1668928 | 0.8999928 | 0.3897929 |

|           |           |           |
|-----------|-----------|-----------|
| 0.6111719 | 0.9005869 | 0.5521674 |
| 0.5001017 | 0.9009359 | 0.5521992 |
| 0.3889920 | 0.8999904 | 0.3898102 |
| 0.5002196 | 0.8999904 | 0.3898510 |
| 0.9447454 | 0.8996848 | 0.5521858 |
| 0.8336500 | 0.8998425 | 0.5521375 |
| 0.7223140 | 0.8999891 | 0.3898450 |
| 0.8335698 | 0.8999935 | 0.3898345 |
| 0.9998429 | 0.7991130 | 0.5522382 |
| 0.0002195 | 0.7999968 | 0.3897385 |
| 0.2795319 | 0.6997348 | 0.5524556 |
| 0.1676898 | 0.6993208 | 0.5523838 |
| 0.0556404 | 0.6999968 | 0.3896102 |
| 0.1668660 | 0.6999947 | 0.3896187 |
| 0.1113462 | 0.7992353 | 0.5523302 |
| 0.2223166 | 0.7999863 | 0.3897106 |
| 0.3334228 | 0.8003248 | 0.5523518 |
| 0.3335627 | 0.7999747 | 0.3897768 |
| 0.6113261 | 0.7019805 | 0.5522850 |
| 0.5003569 | 0.7024472 | 0.5523546 |
| 0.3889926 | 0.6999824 | 0.3897914 |
| 0.5002108 | 0.6999837 | 0.3898811 |
| 0.4441001 | 0.8018497 | 0.5523167 |
| 0.5556467 | 0.7999797 | 0.3898386 |
| 0.6668656 | 0.8001968 | 0.5521891 |
| 0.6668900 | 0.8000151 | 0.3898229 |
| 0.9436280 | 0.6991003 | 0.5522844 |
| 0.8315585 | 0.6989487 | 0.5522401 |
| 0.7222981 | 0.6999960 | 0.3897781 |
| 0.8335080 | 0.6999979 | 0.3897356 |
| 0.7779883 | 0.7998893 | 0.5521827 |
| 0.8889726 | 0.8000167 | 0.3897521 |
| 0.9999159 | 0.5995537 | 0.5523389 |
| 0.0001669 | 0.5999932 | 0.3895703 |
| 0.1117736 | 0.5996967 | 0.5524080 |
| 0.2223091 | 0.5999814 | 0.3895216 |
| 0.3376081 | 0.5993381 | 0.5524988 |
| 0.3335281 | 0.5999720 | 0.3896910 |
| 0.4472112 | 0.6058835 | 0.5524364 |
| 0.5556169 | 0.5999895 | 0.3900035 |
| 0.6606708 | 0.5985607 | 0.5524507 |
| 0.6668163 | 0.6000072 | 0.3898841 |
| 0.7742591 | 0.5989505 | 0.5523727 |
| 0.8889421 | 0.5999984 | 0.3896286 |

|           |           |           |
|-----------|-----------|-----------|
| 0.9999411 | 0.0000000 | 0.5521683 |
| 0.0002232 | 0.0000000 | 0.3898539 |
| 0.1110158 | 0.0000000 | 0.5522596 |
| 0.2223319 | 0.0000000 | 0.3898045 |
| 0.3327978 | 0.0000000 | 0.5522699 |
| 0.3335548 | 0.0000000 | 0.3898338 |
| 0.4441549 | 0.0000000 | 0.5522320 |
| 0.5556721 | 0.0000000 | 0.3898397 |
| 0.6668927 | 0.0000000 | 0.5521219 |
| 0.6668834 | 0.0000000 | 0.3898638 |
| 0.7783580 | 0.0000000 | 0.5521164 |
| 0.8890022 | 0.0000000 | 0.3898457 |
| 0.2801110 | 0.5000000 | 0.5524841 |
| 0.1688429 | 0.5000000 | 0.5524395 |
| 0.0555997 | 0.5000000 | 0.3894931 |
| 0.1668551 | 0.5000000 | 0.3894759 |
| 0.6032247 | 0.5000000 | 0.5526074 |
| 0.3889521 | 0.5000000 | 0.3898125 |
| 0.5001777 | 0.5000000 | 0.3902034 |
| 0.9433435 | 0.5000000 | 0.5523627 |
| 0.8311887 | 0.5000000 | 0.5523672 |
| 0.7222482 | 0.5000000 | 0.3898079 |
| 0.8334773 | 0.5000000 | 0.3896708 |

(2) The structure of TS1

119

Direct

|           |           |           |
|-----------|-----------|-----------|
| 0.2788613 | 0.1003719 | 0.5564528 |
| 0.1676882 | 0.1003952 | 0.5569084 |
| 0.0545330 | 0.1000521 | 0.3854063 |
| 0.1658321 | 0.1000274 | 0.3860333 |
| 0.6118888 | 0.1002241 | 0.5546925 |
| 0.5009182 | 0.1006068 | 0.5556004 |
| 0.3881200 | 0.0998429 | 0.3873721 |
| 0.4990800 | 0.1001884 | 0.3864847 |
| 0.9454725 | 0.1004263 | 0.5565831 |
| 0.8341543 | 0.1004523 | 0.5559697 |
| 0.7211687 | 0.1000740 | 0.3855644 |
| 0.8323656 | 0.1000477 | 0.3850438 |
| 0.0009688 | 0.2007018 | 0.5569191 |
| 0.9989736 | 0.2003146 | 0.3850753 |
| 0.2800895 | 0.3008801 | 0.5507956 |
| 0.1685901 | 0.3008837 | 0.5548618 |
| 0.0548887 | 0.3002730 | 0.3851882 |

|           |           |           |
|-----------|-----------|-----------|
| 0.1664790 | 0.3003266 | 0.3868986 |
| 0.1125202 | 0.2007625 | 0.5567767 |
| 0.2214579 | 0.2000524 | 0.3875151 |
| 0.3344829 | 0.2005080 | 0.5527979 |
| 0.3327801 | 0.2002073 | 0.3900981 |
| 0.6117186 | 0.2995685 | 0.5451113 |
| 0.5007145 | 0.3007646 | 0.5410812 |
| 0.3880677 | 0.2992091 | 0.3964234 |
| 0.4991081 | 0.3003859 | 0.4002193 |
| 0.4453638 | 0.2009713 | 0.5512176 |
| 0.5545630 | 0.2005523 | 0.3906382 |
| 0.6671092 | 0.2006447 | 0.5518814 |
| 0.6654543 | 0.2002007 | 0.3890899 |
| 0.9449438 | 0.3006543 | 0.5568829 |
| 0.8333213 | 0.3007449 | 0.5550572 |
| 0.7198049 | 0.3005834 | 0.3909654 |
| 0.8313091 | 0.3005069 | 0.3871842 |
| 0.7784150 | 0.2004818 | 0.5545779 |
| 0.8874486 | 0.2004006 | 0.3852276 |
| 0.0010199 | 0.4004282 | 0.5566955 |
| 0.9988333 | 0.4000737 | 0.3851794 |
| 0.1125332 | 0.4004488 | 0.5547220 |
| 0.2225721 | 0.4003380 | 0.3893243 |
| 0.3363031 | 0.4006903 | 0.5404087 |
| 0.3344976 | 0.4005835 | 0.3964720 |
| 0.4450391 | 0.3971487 | 0.5261660 |
| 0.5547643 | 0.3968801 | 0.4145569 |
| 0.6652532 | 0.4009911 | 0.5449286 |
| 0.6635069 | 0.4005285 | 0.4007947 |
| 0.7771851 | 0.4007291 | 0.5522956 |
| 0.8873583 | 0.4000916 | 0.3872243 |
| 0.2788509 | 0.8999154 | 0.5566506 |
| 0.1676651 | 0.8999543 | 0.5570202 |
| 0.0545590 | 0.8995647 | 0.3852961 |
| 0.1658675 | 0.8996258 | 0.3859214 |
| 0.6118913 | 0.9002752 | 0.5548911 |
| 0.5009257 | 0.8998282 | 0.5557740 |
| 0.3881255 | 0.8998520 | 0.3873957 |
| 0.4990892 | 0.8994347 | 0.3864992 |
| 0.9454761 | 0.8999593 | 0.5566671 |
| 0.8341653 | 0.9000044 | 0.5561078 |
| 0.7211453 | 0.8996539 | 0.3856204 |
| 0.8323514 | 0.8996381 | 0.3850201 |

|           |           |           |
|-----------|-----------|-----------|
| 0.0009782 | 0.7996910 | 0.5570179 |
| 0.9990243 | 0.7993137 | 0.3849126 |
| 0.2800800 | 0.6993891 | 0.5511182 |
| 0.1685597 | 0.6994465 | 0.5549473 |
| 0.0549818 | 0.6993654 | 0.3850880 |
| 0.1665941 | 0.6993314 | 0.3867812 |
| 0.1124919 | 0.7995950 | 0.5568668 |
| 0.2215545 | 0.7996291 | 0.3873685 |
| 0.3344888 | 0.7997803 | 0.5531384 |
| 0.3328564 | 0.7994651 | 0.3901408 |
| 0.6117774 | 0.7009371 | 0.5454530 |
| 0.5007764 | 0.6996841 | 0.5415743 |
| 0.3881415 | 0.7004621 | 0.3967802 |
| 0.4991476 | 0.6993090 | 0.4007544 |
| 0.4453738 | 0.7994429 | 0.5515217 |
| 0.5545732 | 0.7990698 | 0.3908112 |
| 0.6671452 | 0.7998589 | 0.5521345 |
| 0.6654619 | 0.7995287 | 0.3892629 |
| 0.9449907 | 0.6997294 | 0.5568893 |
| 0.8333698 | 0.6996805 | 0.5551633 |
| 0.7198051 | 0.6991201 | 0.3912185 |
| 0.8313062 | 0.6991820 | 0.3872000 |
| 0.7784540 | 0.7999831 | 0.5548138 |
| 0.8874731 | 0.7992568 | 0.3851142 |
| 0.0010249 | 0.5999070 | 0.5566435 |
| 0.9988865 | 0.5996150 | 0.3851891 |
| 0.1125379 | 0.5998795 | 0.5547236 |
| 0.2226306 | 0.5992950 | 0.3893580 |
| 0.3363544 | 0.5995588 | 0.5408926 |
| 0.3345360 | 0.5990545 | 0.3966625 |
| 0.4451591 | 0.6031849 | 0.5269317 |
| 0.5547932 | 0.6029038 | 0.4154493 |
| 0.6653025 | 0.5995217 | 0.5450955 |
| 0.6634458 | 0.5992166 | 0.4012440 |
| 0.7772391 | 0.5997003 | 0.5523362 |
| 0.8873938 | 0.5996192 | 0.3872843 |
| 0.0009380 | 0.0001763 | 0.5566737 |
| 0.9991125 | 0.9998004 | 0.3852349 |
| 0.1121642 | 0.0001790 | 0.5571367 |
| 0.2212671 | 0.9998367 | 0.3861362 |
| 0.3342178 | 0.0001359 | 0.5574513 |
| 0.3325973 | 0.9998388 | 0.3862322 |
| 0.4453722 | 0.0001891 | 0.5576133 |

|           |           |           |
|-----------|-----------|-----------|
| 0.5546167 | 0.9998123 | 0.3846319 |
| 0.6674627 | 0.0002365 | 0.5558016 |
| 0.6657221 | 0.9998924 | 0.3847521 |
| 0.7787975 | 0.0002360 | 0.5558618 |
| 0.8878658 | 0.9998237 | 0.3848029 |
| 0.2793332 | 0.5000891 | 0.5427436 |
| 0.1688385 | 0.5001528 | 0.5512392 |
| 0.0548759 | 0.4998246 | 0.3852797 |
| 0.1664713 | 0.4998292 | 0.3876003 |
| 0.6120989 | 0.5003167 | 0.5370748 |
| 0.3877635 | 0.4997734 | 0.4047027 |
| 0.4991700 | 0.5001621 | 0.4709283 |
| 0.9449347 | 0.5001630 | 0.5564280 |
| 0.8332860 | 0.5001741 | 0.5540210 |
| 0.7205357 | 0.4998959 | 0.3987904 |
| 0.8310908 | 0.4998693 | 0.3905538 |

(3) The optimized final structure

119

Direct

|           |           |           |
|-----------|-----------|-----------|
| 0.2774986 | 0.1000929 | 0.5522306 |
| 0.1662409 | 0.1000762 | 0.5522151 |
| 0.0553027 | 0.1002434 | 0.3898508 |
| 0.1663815 | 0.1001102 | 0.3898817 |
| 0.6107316 | 0.1000968 | 0.5521519 |
| 0.4995248 | 0.1000993 | 0.5521740 |
| 0.3888177 | 0.0993851 | 0.3899246 |
| 0.4998793 | 0.0990273 | 0.3899425 |
| 0.9440920 | 0.1000712 | 0.5521532 |
| 0.8328478 | 0.1000531 | 0.5521021 |
| 0.7227124 | 0.0997925 | 0.3898679 |
| 0.8336609 | 0.1001187 | 0.3898704 |
| 0.9995338 | 0.2000649 | 0.5522019 |
| 0.0002581 | 0.2008441 | 0.3898162 |
| 0.2775038 | 0.3000856 | 0.5522999 |
| 0.1663013 | 0.3000410 | 0.5522904 |
| 0.0564396 | 0.3008936 | 0.3897281 |
| 0.1684995 | 0.3010249 | 0.3897828 |
| 0.1107927 | 0.2000321 | 0.5522574 |
| 0.2220202 | 0.2000564 | 0.3898587 |
| 0.3329102 | 0.2000710 | 0.5522492 |
| 0.3331107 | 0.1997301 | 0.3899123 |
| 0.6108085 | 0.3001145 | 0.5521673 |
| 0.4996013 | 0.3001010 | 0.5521628 |



|           |           |           |
|-----------|-----------|-----------|
| 0.3886439 | 0.2979793 | 0.3899068 |
| 0.4995879 | 0.2974880 | 0.3898735 |
| 0.4441269 | 0.2001210 | 0.5522194 |
| 0.5558971 | 0.1981439 | 0.3898900 |
| 0.6661848 | 0.2001067 | 0.5521373 |
| 0.6666044 | 0.1996608 | 0.3898834 |
| 0.9441660 | 0.3000867 | 0.5522646 |
| 0.8329497 | 0.3000470 | 0.5522279 |
| 0.7205365 | 0.3002365 | 0.3898313 |
| 0.8323866 | 0.3006351 | 0.3898304 |
| 0.7774175 | 0.2000704 | 0.5521672 |
| 0.8887521 | 0.2007084 | 0.3898159 |
| 0.9996717 | 0.4000895 | 0.5523231 |
| 0.0001046 | 0.4004468 | 0.3896889 |
| 0.1109061 | 0.4000675 | 0.5523510 |
| 0.2257494 | 0.4010206 | 0.3897097 |
| 0.3330003 | 0.4000621 | 0.5522230 |
| 0.3393143 | 0.4014142 | 0.3897531 |
| 0.4441979 | 0.4001010 | 0.5521108 |
| 0.5527791 | 0.3940504 | 0.3898406 |
| 0.6663322 | 0.4000910 | 0.5522246 |
| 0.6624220 | 0.4006022 | 0.3898193 |
| 0.7775339 | 0.4000771 | 0.5523215 |
| 0.8882521 | 0.4002903 | 0.3897500 |
| 0.2774973 | 0.9000480 | 0.5522313 |
| 0.1662462 | 0.9000688 | 0.5522147 |
| 0.0553020 | 0.8997579 | 0.3898509 |
| 0.1663808 | 0.8998921 | 0.3898817 |
| 0.6107283 | 0.9000424 | 0.5521533 |
| 0.4995271 | 0.9000464 | 0.5521756 |
| 0.3888172 | 0.9006178 | 0.3899243 |
| 0.4998786 | 0.9009730 | 0.3899409 |
| 0.9440851 | 0.9000966 | 0.5521522 |
| 0.8328452 | 0.9000914 | 0.5521017 |
| 0.7227119 | 0.9002073 | 0.3898671 |
| 0.8336600 | 0.8998821 | 0.3898700 |
| 0.9995344 | 0.8001019 | 0.5522009 |
| 0.0002568 | 0.7991574 | 0.3898161 |
| 0.2775131 | 0.7000465 | 0.5523014 |
| 0.1663045 | 0.7001169 | 0.5522909 |
| 0.0564382 | 0.6991086 | 0.3897282 |
| 0.1684977 | 0.6989782 | 0.3897824 |
| 0.1107968 | 0.8001178 | 0.5522570 |
| 0.2220187 | 0.7999464 | 0.3898584 |

|            |           |           |
|------------|-----------|-----------|
| 0.3329094  | 0.8000677 | 0.5522513 |
| 0.3331096  | 0.8002738 | 0.3899118 |
| 0.6108036  | 0.7000163 | 0.5521701 |
| 0.4996078  | 0.7000352 | 0.5521656 |
| 0.3886410  | 0.7020257 | 0.3899076 |
| 0.4995847  | 0.7025121 | 0.3898800 |
| 0.4441340  | 0.8000066 | 0.5522223 |
| 0.5558958  | 0.8018556 | 0.3898892 |
| 0.6661849  | 0.8000317 | 0.5521389 |
| 0.6666026  | 0.8003388 | 0.3898827 |
| 0.9441737  | 0.7000745 | 0.5522640 |
| 0.8329555  | 0.7001124 | 0.5522280 |
| 0.7205324  | 0.6997615 | 0.3898322 |
| 0.8323837  | 0.6993647 | 0.3898292 |
| 0.7774188  | 0.8000735 | 0.5521675 |
| 0.8887504  | 0.7992920 | 0.3898149 |
| 0.9996738  | 0.6000815 | 0.5523228 |
| 0.0001043  | 0.5995545 | 0.3896892 |
| 0.1109022  | 0.6000964 | 0.5523512 |
| 0.2257464  | 0.5989835 | 0.3897087 |
| 0.3329984  | 0.6000689 | 0.5522240 |
| 0.3393097  | 0.5985928 | 0.3897522 |
| 0.4442016  | 0.6000351 | 0.5521124 |
| 0.5527678  | 0.6059434 | 0.3898621 |
| 0.6663336  | 0.6000423 | 0.5522262 |
| 0.6624155  | 0.5993941 | 0.3898277 |
| 0.7775268  | 0.6000827 | 0.5523223 |
| 0.8882515  | 0.5997108 | 0.3897502 |
| -0.0004153 | 0.0000827 | 0.5521230 |
| 0.0000411  | 0.0000009 | 0.3898945 |
| 0.1108184  | 0.0000683 | 0.5521891 |
| 0.2216898  | 0.0000011 | 0.3899111 |
| 0.3329046  | 0.0000745 | 0.5522161 |
| 0.3331294  | 0.0000014 | 0.3899309 |
| 0.4440906  | 0.0000648 | 0.5522109 |
| 0.5558349  | 0.0000002 | 0.3899202 |
| 0.6661525  | 0.0000741 | 0.5521007 |
| 0.6671930  | 0.0000001 | 0.3899067 |
| 0.7773620  | 0.0000669 | 0.5520895 |
| 0.8889974  | 0.0000001 | 0.3898658 |
| 0.2775729  | 0.5000765 | 0.5522889 |
| 0.1663530  | 0.5000855 | 0.5523423 |
| 0.0566627  | 0.5000009 | 0.3896230 |
| 0.1688602  | 0.5000011 | 0.3896547 |

|           |           |           |
|-----------|-----------|-----------|
| 0.6109104 | 0.5000707 | 0.5521768 |
| 0.3967337 | 0.5000079 | 0.3896803 |
| 0.4996883 | 0.5000701 | 0.5518933 |
| 0.9442377 | 0.5000785 | 0.5523570 |
| 0.8329796 | 0.5000853 | 0.5523419 |
| 0.7198728 | 0.5000000 | 0.3898444 |
| 0.8311839 | 0.5000004 | 0.3897904 |

**The structures of the first set of the calculation in Fig. 2(b)( Direct coordinates)**

(4) The optimized initial2 geometry.

118

Direct

|           |           |           |
|-----------|-----------|-----------|
| 0.2759935 | 0.1520906 | 0.5813121 |
| 0.1647892 | 0.1514313 | 0.5812690 |
| 0.0531646 | 0.1511728 | 0.4186663 |
| 0.1648252 | 0.1514322 | 0.4186103 |
| 0.6073428 | 0.1523524 | 0.5815499 |
| 0.4966225 | 0.1544836 | 0.5814777 |
| 0.9976161 | 0.2508678 | 0.5812575 |
| 0.2750314 | 0.3529793 | 0.5813494 |
| 0.1637915 | 0.3517357 | 0.5812707 |
| 0.0524724 | 0.3505405 | 0.4188316 |
| 0.1631786 | 0.3506446 | 0.4189734 |
| 0.1087849 | 0.2512848 | 0.5812709 |
| 0.2203679 | 0.2517295 | 0.4187603 |
| 0.3310801 | 0.2537442 | 0.5813850 |
| 0.3322481 | 0.2533521 | 0.4186815 |
| 0.6078680 | 0.3542347 | 0.5809615 |
| 0.4964186 | 0.3643758 | 0.5812490 |
| 0.4418136 | 0.2584888 | 0.5814315 |
| 0.9969088 | 0.4506895 | 0.5811719 |
| 0.1069617 | 0.4506723 | 0.5813343 |
| 0.2167376 | 0.4510353 | 0.4192535 |
| 0.3289076 | 0.4548006 | 0.5814461 |
| 0.3276096 | 0.4518661 | 0.4196739 |
| 0.4375416 | 0.4677353 | 0.5813261 |
| 0.7185193 | 0.1520934 | 0.4186881 |
| 0.8297216 | 0.1514279 | 0.4187306 |
| 0.9413456 | 0.1511712 | 0.5813339 |
| 0.8296900 | 0.1514330 | 0.5813898 |
| 0.3871645 | 0.1523485 | 0.4184500 |
| 0.4978831 | 0.1544835 | 0.4185222 |
| 0.9968876 | 0.2508659 | 0.4187424 |

|           |           |           |
|-----------|-----------|-----------|
| 0.7194821 | 0.3529791 | 0.4186505 |
| 0.8307170 | 0.3517311 | 0.4187288 |
| 0.9420331 | 0.3505398 | 0.5811686 |
| 0.8313298 | 0.3506435 | 0.5810281 |
| 0.8857230 | 0.2512801 | 0.4187282 |
| 0.7741465 | 0.2517280 | 0.5812396 |
| 0.6634326 | 0.2537459 | 0.4186149 |
| 0.6622673 | 0.2533520 | 0.5813183 |
| 0.3866360 | 0.3542364 | 0.4190385 |
| 0.4980832 | 0.3643749 | 0.4187510 |
| 0.5526926 | 0.2584884 | 0.4185685 |
| 0.9975925 | 0.4506891 | 0.4188282 |
| 0.8875482 | 0.4506711 | 0.4186655 |
| 0.7777687 | 0.4510312 | 0.5807473 |
| 0.6656044 | 0.4548003 | 0.4185539 |
| 0.6668976 | 0.4518642 | 0.5803270 |
| 0.5569647 | 0.4677332 | 0.4186730 |
| 0.7185164 | 0.9505934 | 0.4186886 |
| 0.8297217 | 0.9512564 | 0.4187306 |
| 0.9413458 | 0.9515095 | 0.5813339 |
| 0.8296899 | 0.9512543 | 0.5813898 |
| 0.3871636 | 0.9503274 | 0.4184499 |
| 0.4978825 | 0.9481945 | 0.4185223 |
| 0.9968892 | 0.8518155 | 0.4187426 |
| 0.7194841 | 0.7496891 | 0.4186511 |
| 0.8307191 | 0.7509488 | 0.4187287 |
| 0.9420340 | 0.7521399 | 0.5811682 |
| 0.8313299 | 0.7520386 | 0.5810276 |
| 0.8857237 | 0.8514037 | 0.4187283 |
| 0.7741456 | 0.8509569 | 0.5812392 |
| 0.6634341 | 0.8489240 | 0.4186156 |
| 0.6622630 | 0.8493202 | 0.5813180 |
| 0.3866380 | 0.7484349 | 0.4190388 |
| 0.4980856 | 0.7382922 | 0.4187509 |
| 0.5526921 | 0.8441808 | 0.4185686 |
| 0.9975938 | 0.6519924 | 0.4188285 |
| 0.8875499 | 0.6520112 | 0.4186658 |
| 0.7777701 | 0.6516508 | 0.5807471 |
| 0.6656056 | 0.6478679 | 0.4185540 |
| 0.6669017 | 0.6508172 | 0.5803270 |
| 0.5569664 | 0.6349557 | 0.4186731 |
| 0.2759964 | 0.9505911 | 0.5813124 |
| 0.1647897 | 0.9512590 | 0.5812690 |
| 0.0531651 | 0.9515114 | 0.4186663 |

|           |           |           |
|-----------|-----------|-----------|
| 0.1648257 | 0.9512561 | 0.4186103 |
| 0.6073403 | 0.9503272 | 0.5815499 |
| 0.4966204 | 0.9481960 | 0.5814777 |
| 0.9976160 | 0.8518134 | 0.5812572 |
| 0.2750343 | 0.7496888 | 0.5813492 |
| 0.1637921 | 0.7509509 | 0.5812703 |
| 0.0524746 | 0.7521412 | 0.4188319 |
| 0.1631801 | 0.7520410 | 0.4189728 |
| 0.1087851 | 0.8514067 | 0.5812710 |
| 0.2203690 | 0.8509560 | 0.4187603 |
| 0.3310821 | 0.8489250 | 0.5813850 |
| 0.3322489 | 0.8493190 | 0.4186814 |
| 0.6078653 | 0.7484346 | 0.5809605 |
| 0.4964175 | 0.7382944 | 0.5812491 |
| 0.4418166 | 0.8441804 | 0.5814314 |
| 0.9969108 | 0.6519903 | 0.5811715 |
| 0.1069638 | 0.6520124 | 0.5813341 |
| 0.2167368 | 0.6516506 | 0.4192535 |
| 0.3289083 | 0.6478643 | 0.5814458 |
| 0.3276060 | 0.6508183 | 0.4196746 |
| 0.4375408 | 0.6349578 | 0.5813263 |
| 0.9973100 | 0.0513406 | 0.5812827 |
| 0.1089600 | 0.0513449 | 0.5812736 |
| 0.2205133 | 0.0513435 | 0.4185085 |
| 0.3310666 | 0.0513433 | 0.5813059 |
| 0.3320150 | 0.0513399 | 0.4184573 |
| 0.4419791 | 0.0513454 | 0.5814804 |
| 0.9971958 | 0.0513415 | 0.4187172 |
| 0.8855489 | 0.0513416 | 0.4187256 |
| 0.7740047 | 0.0513442 | 0.5814913 |
| 0.6634483 | 0.0513468 | 0.4186947 |
| 0.6624926 | 0.0513419 | 0.5815426 |
| 0.5525310 | 0.0513455 | 0.4185196 |
| 0.2692471 | 0.5513356 | 0.5815237 |
| 0.1608699 | 0.5513412 | 0.5814643 |
| 0.0520902 | 0.5513412 | 0.4189390 |
| 0.1621551 | 0.5513427 | 0.4191797 |
| 0.6190198 | 0.5513424 | 0.5793281 |
| 0.7252568 | 0.5513380 | 0.4184763 |
| 0.8336318 | 0.5513417 | 0.4185356 |
| 0.9424146 | 0.5513406 | 0.5810610 |
| 0.8323499 | 0.5513409 | 0.5808209 |
| 0.3754814 | 0.5513438 | 0.4206721 |

(5) The optimized intermediate2 geometry

118

Direct

|           |           |           |
|-----------|-----------|-----------|
| 0.3381389 | 0.1029231 | 0.5521639 |
| 0.2270615 | 0.1019583 | 0.5518017 |
| 0.9958714 | 0.0997892 | 0.3893751 |
| 0.1071496 | 0.0979078 | 0.3888418 |
| 0.6709523 | 0.0965708 | 0.5539091 |
| 0.5600487 | 0.0996620 | 0.5537642 |
| 0.3301914 | 0.0963985 | 0.3883747 |
| 0.4410803 | 0.0995078 | 0.3884942 |
| 0.0052275 | 0.0998594 | 0.5529813 |
| 0.8939508 | 0.0979846 | 0.5534911 |
| 0.6629747 | 0.1027139 | 0.3899526 |
| 0.7740310 | 0.1018420 | 0.3903309 |
| 0.0616233 | 0.2007340 | 0.5523686 |
| 0.9394853 | 0.2007015 | 0.3899186 |
| 0.3452054 | 0.3066644 | 0.5498399 |
| 0.2314750 | 0.3039448 | 0.5505860 |
| 0.9960420 | 0.2997807 | 0.3895523 |
| 0.1077959 | 0.2980264 | 0.3890657 |
| 0.1738731 | 0.2029190 | 0.5514465 |
| 0.1620229 | 0.1971664 | 0.3887464 |
| 0.3954730 | 0.2035859 | 0.5516162 |
| 0.2731072 | 0.1954543 | 0.3885523 |
| 0.6737739 | 0.2932362 | 0.5531125 |
| 0.5637138 | 0.3001775 | 0.5518050 |
| 0.3274101 | 0.2930889 | 0.3890708 |
| 0.4374911 | 0.3000321 | 0.3904021 |
| 0.5058814 | 0.2009956 | 0.5522643 |
| 0.4952859 | 0.2008187 | 0.3900168 |
| 0.7280455 | 0.1956151 | 0.5536782 |
| 0.6057179 | 0.2034195 | 0.3905793 |
| 0.0051108 | 0.2998376 | 0.5527904 |
| 0.8933360 | 0.2981486 | 0.5532242 |
| 0.6559724 | 0.3065008 | 0.3923049 |
| 0.7696589 | 0.3038613 | 0.3915783 |
| 0.8391472 | 0.1973184 | 0.5535095 |
| 0.8272374 | 0.2028520 | 0.3907650 |
| 0.0604475 | 0.4003177 | 0.5525950 |
| 0.9406818 | 0.4002599 | 0.3896914 |
| 0.1729039 | 0.4019210 | 0.5514548 |
| 0.1651559 | 0.3970589 | 0.3890920 |
| 0.4064748 | 0.4092103 | 0.5470400 |

|           |           |           |
|-----------|-----------|-----------|
| 0.2770942 | 0.3949098 | 0.3891927 |
| 0.5218404 | 0.4056403 | 0.5495120 |
| 0.4794634 | 0.4054532 | 0.3927311 |
| 0.7240071 | 0.3950704 | 0.5530007 |
| 0.5947164 | 0.4090590 | 0.3951702 |
| 0.8359162 | 0.3972016 | 0.5531483 |
| 0.8282249 | 0.4019060 | 0.3907429 |
| 0.3354836 | 0.9023123 | 0.5517875 |
| 0.2239330 | 0.9010663 | 0.5527134 |
| 0.9991902 | 0.8989023 | 0.3887031 |
| 0.1104883 | 0.8971467 | 0.3883836 |
| 0.6689599 | 0.8970469 | 0.5537106 |
| 0.5580131 | 0.8994843 | 0.5545198 |
| 0.3321038 | 0.8968877 | 0.3885184 |
| 0.4430391 | 0.8993392 | 0.3876566 |
| 0.0018801 | 0.8989630 | 0.5535795 |
| 0.8905678 | 0.8972099 | 0.5539104 |
| 0.6655560 | 0.9020878 | 0.3903722 |
| 0.7771226 | 0.9009494 | 0.3895121 |
| 0.0556741 | 0.7986097 | 0.5536979 |
| 0.9453942 | 0.7985460 | 0.3886180 |
| 0.3327817 | 0.7040216 | 0.5466714 |
| 0.2225072 | 0.7015429 | 0.5522849 |
| 0.0016918 | 0.6974141 | 0.3891786 |
| 0.1143768 | 0.6950447 | 0.3893180 |
| 0.1670293 | 0.8008282 | 0.5535917 |
| 0.1673194 | 0.7963736 | 0.3886105 |
| 0.3898682 | 0.8032565 | 0.5482866 |
| 0.2784833 | 0.7954863 | 0.3895204 |
| 0.6645583 | 0.6957862 | 0.5476627 |
| 0.5560208 | 0.7011456 | 0.5396666 |
| 0.3363839 | 0.6956584 | 0.3945108 |
| 0.4449143 | 0.7009767 | 0.4023000 |
| 0.5011075 | 0.8005133 | 0.5497561 |
| 0.4998912 | 0.8003622 | 0.3923041 |
| 0.7225361 | 0.7956266 | 0.5526803 |
| 0.6111245 | 0.8030533 | 0.3937442 |
| 0.9993622 | 0.6974645 | 0.5531980 |
| 0.8866695 | 0.6951419 | 0.5529433 |
| 0.6682415 | 0.7038910 | 0.3953662 |
| 0.7785546 | 0.7014983 | 0.3899118 |
| 0.8337021 | 0.7964796 | 0.5536249 |
| 0.8340446 | 0.8007663 | 0.3886869 |
| 0.0572301 | 0.5988582 | 0.5525547 |

|           |           |           |
|-----------|-----------|-----------|
| 0.9438384 | 0.5988165 | 0.3898307 |
| 0.1693878 | 0.6003874 | 0.5512260 |
| 0.1724784 | 0.5937787 | 0.3899533 |
| 0.3871332 | 0.6077612 | 0.5332508 |
| 0.2883702 | 0.5894747 | 0.3917916 |
| 0.4912293 | 0.6194288 | 0.5063145 |
| 0.5097572 | 0.6192971 | 0.4356694 |
| 0.7126080 | 0.5896013 | 0.5503997 |
| 0.6138879 | 0.6076192 | 0.4087488 |
| 0.8285579 | 0.5938903 | 0.5523242 |
| 0.8316971 | 0.6003990 | 0.3909944 |
| 0.0588836 | 0.9994517 | 0.5530541 |
| 0.9422041 | 0.9993722 | 0.3892697 |
| 0.1700962 | 0.0012168 | 0.5524830 |
| 0.1641928 | 0.9975861 | 0.3885743 |
| 0.3922174 | 0.0022943 | 0.5530633 |
| 0.2754597 | 0.9966950 | 0.3882793 |
| 0.5033140 | 0.0003199 | 0.5543308 |
| 0.4977808 | 0.0001359 | 0.3879101 |
| 0.7256327 | 0.9968505 | 0.5539447 |
| 0.6088785 | 0.0020780 | 0.3891527 |
| 0.8368648 | 0.9976882 | 0.5536808 |
| 0.8309755 | 0.0011169 | 0.3897175 |
| 0.3409426 | 0.5052644 | 0.5428578 |
| 0.2284531 | 0.5019902 | 0.5496878 |
| 0.9988412 | 0.4988431 | 0.3896168 |
| 0.1115290 | 0.4971938 | 0.3893609 |
| 0.6574394 | 0.4853724 | 0.5516259 |
| 0.3435227 | 0.4853012 | 0.3906049 |
| 0.0022336 | 0.4988907 | 0.5527445 |
| 0.8895345 | 0.4973142 | 0.5530018 |
| 0.6601800 | 0.5051600 | 0.3992782 |
| 0.7726395 | 0.5019630 | 0.3924563 |

(6) The structure of TS2

118

Direct

|            |           |          |
|------------|-----------|----------|
| 0.3378882  | 0.0965091 | 0.552903 |
| 0.2266108  | 0.0958619 | 0.553323 |
| -0.0036775 | 0.1056084 | 0.390609 |
| 0.1074702  | 0.1036923 | 0.390767 |
| 0.6709616  | 0.0901830 | 0.551437 |



|            |           |          |
|------------|-----------|----------|
| 0.5597567  | 0.0940807 | 0.551437 |
| 0.3303541  | 0.1029638 | 0.388718 |
| 0.4414004  | 0.1067107 | 0.387688 |
| 1.0050253  | 0.0937699 | 0.553376 |
| 0.8937803  | 0.0917419 | 0.5527   |
| 0.6635981  | 0.1093942 | 0.388073 |
| 0.7747458  | 0.1078962 | 0.38934  |
| 0.0612881  | 0.1947735 | 0.55491  |
| 0.9401910  | 0.2067132 | 0.391347 |
| 0.3452191  | 0.3000153 | 0.557879 |
| 0.2314081  | 0.2977930 | 0.557999 |
| -0.0028576 | 0.3058573 | 0.392199 |
| 0.1090864  | 0.3043572 | 0.39349  |
| 0.1734857  | 0.1967388 | 0.555697 |
| 0.1626209  | 0.2031561 | 0.392671 |
| 0.3953307  | 0.1970141 | 0.555227 |
| 0.2731542  | 0.2013963 | 0.391991 |
| 0.6739030  | 0.2866391 | 0.553472 |
| 0.5638382  | 0.2947117 | 0.554415 |
| 0.3276655  | 0.2993318 | 0.393499 |
| 0.4376475  | 0.3062433 | 0.391069 |
| 0.5057966  | 0.1953322 | 0.553529 |
| 0.4958970  | 0.2076286 | 0.389765 |
| 0.7281198  | 0.1890499 | 0.552348 |
| 0.6062237  | 0.2097863 | 0.389334 |
| 1.0045799  | 0.2939635 | 0.555311 |
| 0.8929188  | 0.2922204 | 0.553976 |
| 0.6562889  | 0.3130301 | 0.39154  |
| 0.7704161  | 0.3099562 | 0.391796 |
| 0.8390673  | 0.1910668 | 0.552825 |
| 0.8281524  | 0.2088816 | 0.390969 |
| 0.0600546  | 0.3944553 | 0.556701 |
| 0.9417533  | 0.4060348 | 0.391804 |
| 0.1727348  | 0.3956753 | 0.558627 |
| 0.1670905  | 0.4034461 | 0.394338 |
| 0.4067096  | 0.4027184 | 0.556697 |
| 0.2790892  | 0.4011127 | 0.396188 |
| 0.5245761  | 0.4014010 | 0.555579 |
| 0.4775913  | 0.4124190 | 0.390486 |
| 0.7232928  | 0.3885516 | 0.554416 |
| 0.5955829  | 0.4149909 | 0.393858 |
| 0.8351885  | 0.3912354 | 0.554382 |
| 0.8289991  | 0.4075802 | 0.392223 |

|           |           |          |
|-----------|-----------|----------|
| 0.3347552 | 0.8958641 | 0.546355 |
| 0.2237323 | 0.8948158 | 0.548006 |
| 0.9992512 | 0.9047441 | 0.388249 |
| 0.1102085 | 0.9033368 | 0.387044 |
| 0.6683548 | 0.8904940 | 0.551235 |
| 0.5575207 | 0.8942987 | 0.549668 |
| 0.3322430 | 0.9043215 | 0.384128 |
| 0.4431725 | 0.9084185 | 0.381816 |
| 1.0018829 | 0.8924244 | 0.551774 |
| 0.8903611 | 0.8906587 | 0.55214  |
| 0.6667610 | 0.9092905 | 0.385848 |
| 0.7777061 | 0.9071805 | 0.387199 |
| 0.0560892 | 0.7920796 | 0.550929 |
| 0.9454458 | 0.8040685 | 0.38789  |
| 0.3352128 | 0.6965955 | 0.537052 |
| 0.2248861 | 0.6947056 | 0.54562  |
| 1.0019333 | 0.7031672 | 0.388363 |
| 0.1150501 | 0.7012375 | 0.387102 |
| 0.1681434 | 0.7940783 | 0.548401 |
| 0.1671000 | 0.8026700 | 0.38553  |
| 0.3888286 | 0.7960459 | 0.541828 |
| 0.2783033 | 0.8025120 | 0.38468  |
| 0.6614471 | 0.6879026 | 0.553323 |
| 0.5538569 | 0.6981125 | 0.552049 |
| 0.3360376 | 0.7038665 | 0.388423 |
| 0.4470010 | 0.7131530 | 0.394323 |
| 0.5003246 | 0.7947011 | 0.547156 |
| 0.5010646 | 0.8105652 | 0.383697 |
| 0.7212349 | 0.7888599 | 0.552176 |
| 0.6119441 | 0.8100945 | 0.386353 |
| 0.9991616 | 0.6913689 | 0.551673 |
| 0.8859815 | 0.6888040 | 0.552796 |
| 0.6669779 | 0.7101201 | 0.390124 |
| 0.7779374 | 0.7071806 | 0.388381 |
| 0.8329224 | 0.7898683 | 0.552387 |
| 0.8339506 | 0.8062930 | 0.387302 |
| 0.0580826 | 0.5928853 | 0.552552 |
| 0.9438867 | 0.6046397 | 0.390145 |
| 0.1698383 | 0.5940507 | 0.550639 |
| 0.1744606 | 0.6002309 | 0.388213 |
| 0.3892968 | 0.5930521 | 0.524617 |
| 0.2896633 | 0.5978945 | 0.388106 |
| 0.4501260 | 0.5639685 | 0.469241 |

|           |            |          |
|-----------|------------|----------|
| 0.5041853 | 0.6255801  | 0.420087 |
| 0.7103577 | 0.5820078  | 0.555008 |
| 0.6106514 | 0.6135734  | 0.403239 |
| 0.8268028 | 0.5873714  | 0.55412  |
| 0.8318338 | 0.6061585  | 0.391431 |
| 0.0587323 | 0.9933495  | 0.552242 |
| 0.9425708 | 1.0053913  | 0.389312 |
| 0.1696971 | -0.0047945 | 0.551162 |
| 0.1641035 | 1.0037639  | 0.388412 |
| 0.3916706 | -0.0040812 | 0.549806 |
| 0.2755763 | 1.0032855  | 0.386901 |
| 0.5029029 | 0.9948953  | 0.549855 |
| 0.4982439 | 0.0082003  | 0.384328 |
| 0.7254291 | 0.9905036  | 0.551456 |
| 0.6096869 | 0.0090358  | 0.385647 |
| 0.8367355 | 0.9913306  | 0.551987 |
| 0.8314928 | 0.0074149  | 0.38869  |
| 0.3410858 | 0.4963437  | 0.551946 |
| 0.2290244 | 0.4954766  | 0.556021 |
| 1.0002441 | 0.5046982  | 0.391204 |
| 0.1126993 | 0.5034279  | 0.391311 |
| 0.6537035 | 0.4774516  | 0.555449 |
| 0.3506997 | 0.4905873  | 0.395468 |
| 1.0019729 | 0.4929553  | 0.554966 |
| 0.8890430 | 0.4914080  | 0.554666 |
| 0.6603790 | 0.5100846  | 0.398945 |
| 0.7725458 | 0.5074733  | 0.394052 |

(7) The optimized final2 geometry

118

Direct

|           |           |           |
|-----------|-----------|-----------|
| 0.3390656 | 0.1056929 | 0.5528747 |
| 0.2277753 | 0.1037745 | 0.5530518 |
| 0.9966328 | 0.1007674 | 0.3899138 |
| 0.1078510 | 0.1007813 | 0.3897194 |
| 0.6720213 | 0.0927318 | 0.5524098 |
| 0.5610704 | 0.0980102 | 0.5525255 |
| 0.3299745 | 0.1007068 | 0.3890372 |
| 0.4411906 | 0.1006385 | 0.3887519 |
| 1.0061992 | 0.0993080 | 0.5529482 |
| 0.8950175 | 0.0951995 | 0.5527094 |
| 0.6632987 | 0.1007254 | 0.3891532 |
| 0.7744983 | 0.1007925 | 0.3895292 |
| 0.0640417 | 0.2012606 | 0.5530768 |

|           |           |           |
|-----------|-----------|-----------|
| 0.9412337 | 0.2007731 | 0.3897951 |
| 0.3510664 | 0.3109118 | 0.5530545 |
| 0.2367165 | 0.3072979 | 0.5531370 |
| 0.9966713 | 0.3007437 | 0.3896206 |
| 0.1078971 | 0.3007437 | 0.3894944 |
| 0.1766108 | 0.2054447 | 0.5530858 |
| 0.1633013 | 0.2007811 | 0.3895127 |
| 0.3980944 | 0.2058919 | 0.5528801 |
| 0.2745370 | 0.2007400 | 0.3891486 |
| 0.6772688 | 0.2885267 | 0.5524094 |
| 0.5678474 | 0.2975796 | 0.5526277 |
| 0.3300132 | 0.3006884 | 0.3887359 |
| 0.4412323 | 0.3006174 | 0.3883742 |
| 0.5082404 | 0.2001905 | 0.5526318 |
| 0.4966520 | 0.2006212 | 0.3885561 |
| 0.7307383 | 0.1912164 | 0.5524221 |
| 0.6078849 | 0.2006906 | 0.3887378 |
| 1.0087188 | 0.3007110 | 0.5530530 |
| 0.8963589 | 0.2967009 | 0.5527901 |
| 0.6633315 | 0.3007204 | 0.3888012 |
| 0.7745192 | 0.3007682 | 0.3892334 |
| 0.8417309 | 0.1948735 | 0.5525926 |
| 0.8299642 | 0.2007867 | 0.3896020 |
| 0.0654170 | 0.4021337 | 0.5532970 |
| 0.9412281 | 0.4007328 | 0.3893764 |
| 0.1805174 | 0.4064598 | 0.5532216 |
| 0.1633749 | 0.4007630 | 0.3892640 |
| 0.4172402 | 0.4133712 | 0.5531926 |
| 0.2745567 | 0.4007285 | 0.3888640 |
| 0.5324079 | 0.4061382 | 0.5529546 |
| 0.4966971 | 0.4005981 | 0.3881588 |
| 0.7261170 | 0.3903627 | 0.5526860 |
| 0.6078928 | 0.4006597 | 0.3883038 |
| 0.8376853 | 0.3948676 | 0.5528491 |
| 0.8299957 | 0.4007535 | 0.3891539 |
| 0.3333841 | 0.9065800 | 0.5528510 |
| 0.2225111 | 0.9029162 | 0.5530436 |
| 0.9965942 | 0.9007430 | 0.3897048 |
| 0.1078371 | 0.9007727 | 0.3895439 |
| 0.6659050 | 0.8919444 | 0.5526472 |
| 0.5556948 | 0.8975814 | 0.5526517 |
| 0.3299047 | 0.9007110 | 0.3889256 |
| 0.4411610 | 0.9006251 | 0.3887607 |
| 1.0001082 | 0.8964588 | 0.5531519 |

|           |           |           |
|-----------|-----------|-----------|
| 0.8874664 | 0.8923639 | 0.5529562 |
| 0.6632535 | 0.9007096 | 0.3891519 |
| 0.7744809 | 0.9007698 | 0.3894242 |
| 0.0554937 | 0.7970576 | 0.5532262 |
| 0.9411858 | 0.8007359 | 0.3894568 |
| 0.3381682 | 0.7073557 | 0.5529555 |
| 0.2266078 | 0.7028953 | 0.5531556 |
| 0.9966278 | 0.7007319 | 0.3893244 |
| 0.1078534 | 0.7007361 | 0.3892432 |
| 0.1678968 | 0.8010494 | 0.5531152 |
| 0.1632926 | 0.8007535 | 0.3893260 |
| 0.3869059 | 0.8092119 | 0.5527548 |
| 0.2744762 | 0.8007253 | 0.3889912 |
| 0.6467447 | 0.6843740 | 0.5530674 |
| 0.5314124 | 0.6912866 | 0.5529333 |
| 0.3299685 | 0.7007126 | 0.3887103 |
| 0.4411790 | 0.7006187 | 0.3885035 |
| 0.4962249 | 0.8001373 | 0.5527137 |
| 0.4965878 | 0.8006264 | 0.3886877 |
| 0.7129030 | 0.7868917 | 0.5528996 |
| 0.6078067 | 0.8006866 | 0.3888502 |
| 0.9988326 | 0.6956206 | 0.5532719 |
| 0.8836606 | 0.6913345 | 0.5531501 |
| 0.6632756 | 0.7006893 | 0.3888903 |
| 0.7744707 | 0.7007494 | 0.3891027 |
| 0.8273388 | 0.7904601 | 0.5529618 |
| 0.8299298 | 0.8007411 | 0.3893681 |
| 0.0599152 | 0.5987674 | 0.5534840 |
| 0.9412118 | 0.6007298 | 0.3891660 |
| 0.1745339 | 0.6018478 | 0.5533891 |
| 0.1633465 | 0.6007654 | 0.3891410 |
| 0.4114449 | 0.6211476 | 0.5530827 |
| 0.2745494 | 0.6007358 | 0.3888189 |
| 0.4412481 | 0.5006051 | 0.3882040 |
| 0.4966457 | 0.6006110 | 0.3883880 |
| 0.7047787 | 0.5825655 | 0.5532311 |
| 0.6078779 | 0.6006517 | 0.3884387 |
| 0.8245397 | 0.5903135 | 0.5532126 |
| 0.8299578 | 0.6007361 | 0.3890210 |
| 0.0579594 | 0.9984086 | 0.5531282 |
| 0.9411876 | 0.0007530 | 0.3898491 |
| 0.1691240 | 0.0025638 | 0.5530909 |
| 0.1632679 | 1.0007673 | 0.3895532 |
| 0.3919579 | 0.0051091 | 0.5528139 |

|           |           |           |
|-----------|-----------|-----------|
| 0.2744710 | 1.0007108 | 0.3892271 |
| 0.5028876 | 0.9998011 | 0.5526091 |
| 0.4966115 | 0.0006175 | 0.3888111 |
| 0.7249150 | 0.9921598 | 0.5525405 |
| 0.6078273 | 0.0006849 | 0.3889623 |
| 0.8362694 | 0.9940270 | 0.5526760 |
| 0.8299419 | 0.0007623 | 0.3896790 |
| 0.3595693 | 0.5153423 | 0.5532558 |
| 0.2397270 | 0.5074409 | 0.5533272 |
| 0.9966462 | 0.5007287 | 0.3892893 |
| 0.1079253 | 0.5007272 | 0.3892131 |
| 0.6532591 | 0.4767104 | 0.5529629 |
| 0.3300093 | 0.5006909 | 0.3885716 |
| 1.0044135 | 0.4989800 | 0.5533819 |
| 0.8897131 | 0.4958756 | 0.5532512 |
| 0.6633247 | 0.5006891 | 0.3885199 |
| 0.7745435 | 0.5007452 | 0.3888628 |

**The structures of the first set of the calculation in Fig. 3 (c)**

(8) The optimized initial3 geometry

106

Direct

|           |           |           |
|-----------|-----------|-----------|
| 0.2769610 | 0.0994055 | 0.5518204 |
| 0.1663658 | 0.1000233 | 0.5519856 |
| 0.0552647 | 0.1002157 | 0.3900606 |
| 0.1663620 | 0.1000926 | 0.3897839 |
| 0.6118920 | 0.1004266 | 0.5511918 |
| 0.4990823 | 0.1009205 | 0.5513052 |
| 0.3887767 | 0.0993942 | 0.3893203 |
| 0.4998644 | 0.0990194 | 0.3893353 |
| 0.9449844 | 0.0999990 | 0.5519483 |
| 0.8340380 | 0.0997129 | 0.5516342 |
| 0.7227019 | 0.0997513 | 0.3896729 |
| 0.8336454 | 0.1000844 | 0.3899925 |
| 0.0000126 | 0.2000550 | 0.5519345 |
| 0.0001680 | 0.2007735 | 0.3898466 |
| 0.2744539 | 0.2948877 | 0.5509517 |
| 0.1675623 | 0.3001093 | 0.5514409 |
| 0.0562460 | 0.3008371 | 0.3895111 |
| 0.1682798 | 0.3009625 | 0.3895027 |
| 0.1109600 | 0.1997838 | 0.5518820 |
| 0.2219288 | 0.2000531 | 0.3895437 |
| 0.3335520 | 0.2010690 | 0.5513399 |

|           |           |           |
|-----------|-----------|-----------|
| 0.3330290 | 0.1997211 | 0.3894502 |
| 0.3884719 | 0.2979577 | 0.3899151 |
| 0.4994859 | 0.2974427 | 0.3901618 |
| 0.4416568 | 0.1942653 | 0.5509732 |
| 0.5558694 | 0.1980988 | 0.3896579 |
| 0.6706336 | 0.1926805 | 0.5507965 |
| 0.6665856 | 0.1996095 | 0.3896807 |
| 0.9444247 | 0.2999534 | 0.5518441 |
| 0.8327659 | 0.3007093 | 0.5515214 |
| 0.7205547 | 0.3001301 | 0.3897257 |
| 0.8323661 | 0.3005464 | 0.3894623 |
| 0.7778165 | 0.1994846 | 0.5512983 |
| 0.8887009 | 0.2006764 | 0.3898070 |
| 0.9992365 | 0.4000960 | 0.5518268 |
| 0.9999310 | 0.4004061 | 0.3892021 |
| 0.1109768 | 0.4006133 | 0.5514147 |
| 0.2253439 | 0.4009596 | 0.3896468 |
| 0.3388990 | 0.4013035 | 0.3901042 |
| 0.5528956 | 0.3938610 | 0.3903485 |
| 0.6625459 | 0.4005198 | 0.3900431 |
| 0.7831363 | 0.3996308 | 0.5512093 |
| 0.8881173 | 0.4002359 | 0.3891701 |
| 0.2769610 | 0.9005945 | 0.5518204 |
| 0.1663658 | 0.8999767 | 0.5519856 |
| 0.0552647 | 0.8997843 | 0.3900606 |
| 0.1663620 | 0.8999074 | 0.3897839 |
| 0.6118920 | 0.8995734 | 0.5511918 |
| 0.4990823 | 0.8990795 | 0.5513052 |
| 0.3887767 | 0.9006058 | 0.3893203 |
| 0.4998644 | 0.9009806 | 0.3893353 |
| 0.9449844 | 0.9000010 | 0.5519483 |
| 0.8340380 | 0.9002871 | 0.5516342 |
| 0.7227019 | 0.9002487 | 0.3896729 |
| 0.8336454 | 0.8999156 | 0.3899925 |
| 0.0000126 | 0.7999450 | 0.5519345 |
| 0.0001680 | 0.7992265 | 0.3898466 |
| 0.2744539 | 0.7051123 | 0.5509517 |
| 0.1675623 | 0.6998907 | 0.5514409 |
| 0.0562460 | 0.6991629 | 0.3895111 |
| 0.1682798 | 0.6990375 | 0.3895027 |
| 0.1109600 | 0.8002162 | 0.5518820 |
| 0.2219288 | 0.7999469 | 0.3895437 |
| 0.3335520 | 0.7989310 | 0.5513399 |
| 0.3330290 | 0.8002789 | 0.3894502 |

|           |           |           |
|-----------|-----------|-----------|
| 0.3884719 | 0.7020423 | 0.3899151 |
| 0.4994859 | 0.7025573 | 0.3901618 |
| 0.4416568 | 0.8057347 | 0.5509732 |
| 0.5558694 | 0.8019012 | 0.3896579 |
| 0.6706336 | 0.8073195 | 0.5507965 |
| 0.6665856 | 0.8003905 | 0.3896807 |
| 0.9444247 | 0.7000466 | 0.5518441 |
| 0.8327659 | 0.6992907 | 0.5515214 |
| 0.7205547 | 0.6998699 | 0.3897257 |
| 0.8323661 | 0.6994536 | 0.3894623 |
| 0.7778165 | 0.8005154 | 0.5512983 |
| 0.8887009 | 0.7993236 | 0.3898070 |
| 0.9992365 | 0.5999040 | 0.5518268 |
| 0.9999310 | 0.5995939 | 0.3892021 |
| 0.1109768 | 0.5993867 | 0.5514147 |
| 0.2253439 | 0.5990404 | 0.3896468 |
| 0.3388990 | 0.5986965 | 0.3901042 |
| 0.5528956 | 0.6061390 | 0.3903485 |
| 0.6625459 | 0.5994802 | 0.3900431 |
| 0.7831363 | 0.6003692 | 0.5512093 |
| 0.8881173 | 0.5997641 | 0.3891701 |
| 0.0002760 | 0.0000000 | 0.5520523 |
| 0.0000638 | 0.0000000 | 0.3902374 |
| 0.1109271 | 0.0000000 | 0.5520911 |
| 0.2216448 | 0.0000000 | 0.3896838 |
| 0.3328817 | 0.0000000 | 0.5518207 |
| 0.3331145 | 0.0000000 | 0.3893698 |
| 0.4436774 | 0.0000000 | 0.5515927 |
| 0.5557826 | 0.0000000 | 0.3893810 |
| 0.6674887 | 0.0000000 | 0.5514179 |
| 0.6672447 | 0.0000000 | 0.3895781 |
| 0.7782318 | 0.0000000 | 0.5515548 |
| 0.8889783 | 0.0000000 | 0.3901919 |
| 0.1586830 | 0.5000000 | 0.5508968 |
| 0.0563963 | 0.5000000 | 0.3891295 |
| 0.1685277 | 0.5000000 | 0.3894666 |
| 0.3958700 | 0.5000000 | 0.3902005 |
| 0.9448865 | 0.5000000 | 0.5518635 |
| 0.8312089 | 0.5000000 | 0.5515707 |
| 0.7199049 | 0.5000000 | 0.3896657 |
| 0.8311306 | 0.5000000 | 0.3891275 |

(9)The structure of TS3



## Direct

|           |           |           |
|-----------|-----------|-----------|
| 0.2759856 | 0.1013734 | 0.5510947 |
| 0.1646467 | 0.1001843 | 0.5515369 |
| 0.0568140 | 0.0980273 | 0.3890753 |
| 0.1681020 | 0.0968227 | 0.3891565 |
| 0.6107858 | 0.0965918 | 0.5506025 |
| 0.4989489 | 0.0988819 | 0.5511231 |
| 0.3902367 | 0.0992393 | 0.3886084 |
| 0.5012401 | 0.1023424 | 0.3891135 |
| 0.9423189 | 0.0990975 | 0.5510762 |
| 0.8315406 | 0.0978646 | 0.5511072 |
| 0.7239035 | 0.1015642 | 0.3895013 |
| 0.8351283 | 0.0998759 | 0.3894094 |
| 0.9984680 | 0.1992265 | 0.5513009 |
| 0.0003334 | 0.1984089 | 0.3894233 |
| 0.2742307 | 0.2949954 | 0.5513774 |
| 0.1671475 | 0.2992357 | 0.5514749 |
| 0.0546433 | 0.2986011 | 0.3897124 |
| 0.1656121 | 0.2971280 | 0.3903288 |
| 0.1092438 | 0.1994271 | 0.5514018 |
| 0.2223114 | 0.1974926 | 0.3897287 |
| 0.3344239 | 0.2022350 | 0.5510991 |
| 0.3335626 | 0.1981775 | 0.3899098 |
| 0.3883945 | 0.2983407 | 0.3923632 |
| 0.4995046 | 0.3015274 | 0.3929758 |
| 0.4426245 | 0.1930458 | 0.5519383 |
| 0.5559373 | 0.2022951 | 0.3909489 |
| 0.6686567 | 0.1910178 | 0.5500922 |
| 0.6672758 | 0.2015879 | 0.3906952 |
| 0.9435688 | 0.2993663 | 0.5513816 |
| 0.8315714 | 0.2996441 | 0.5510736 |
| 0.7216536 | 0.3019528 | 0.3911133 |
| 0.8327112 | 0.3005241 | 0.3900687 |
| 0.7754211 | 0.1980671 | 0.5509179 |
| 0.8892504 | 0.2000734 | 0.3895604 |
| 0.9993395 | 0.3990510 | 0.5513821 |
| 0.9982275 | 0.3990762 | 0.3895640 |
| 0.1114071 | 0.3998891 | 0.5513561 |
| 0.2206308 | 0.3969819 | 0.3917328 |
| 0.3314812 | 0.3966387 | 0.3936590 |
| 0.5540131 | 0.4030585 | 0.3936189 |
| 0.6653781 | 0.4024020 | 0.3922892 |

|           |           |           |
|-----------|-----------|-----------|
| 0.7833044 | 0.3988956 | 0.5506562 |
| 0.8868223 | 0.4008987 | 0.3898043 |
| 0.2708493 | 0.9086726 | 0.5518608 |
| 0.1624094 | 0.9020553 | 0.5540764 |
| 0.0605298 | 0.8967130 | 0.3887121 |
| 0.1741957 | 0.8943150 | 0.3904949 |
| 0.6076822 | 0.8937726 | 0.5474339 |
| 0.4987690 | 0.8996176 | 0.5415561 |
| 0.3945153 | 0.8998764 | 0.3922720 |
| 0.5037066 | 0.9053912 | 0.3875343 |
| 0.9442770 | 0.8981326 | 0.5512039 |
| 0.8336002 | 0.8979895 | 0.5507038 |
| 0.7231981 | 0.9012741 | 0.3887470 |
| 0.8346622 | 0.9000204 | 0.3890408 |
| 0.0014812 | 0.7979170 | 0.5517710 |
| 0.0021947 | 0.7987590 | 0.3886186 |
| 0.2829022 | 0.7078857 | 0.5386246 |
| 0.1721988 | 0.6978906 | 0.5490940 |
| 0.0579690 | 0.6991473 | 0.3891760 |
| 0.1700360 | 0.6983430 | 0.3920111 |
| 0.1129325 | 0.7978542 | 0.5527597 |
| 0.2336707 | 0.7930273 | 0.3943914 |
| 0.3176924 | 0.8105322 | 0.5400353 |
| 0.3528800 | 0.7938704 | 0.4040289 |
| 0.3941361 | 0.7628414 | 0.5020761 |
| 0.4917406 | 0.7110804 | 0.3864806 |
| 0.4975233 | 0.5023182 | 0.3937822 |
| 0.5548526 | 0.8035257 | 0.3861967 |
| 0.6695404 | 0.8018117 | 0.5487900 |
| 0.6666128 | 0.8018707 | 0.3881707 |
| 0.9458790 | 0.6985198 | 0.5512230 |
| 0.8335095 | 0.6973636 | 0.5508542 |
| 0.7206147 | 0.7017585 | 0.3896573 |
| 0.8328863 | 0.7006989 | 0.3893619 |
| 0.7764698 | 0.7979930 | 0.5504904 |
| 0.8899411 | 0.7997592 | 0.3887647 |
| 0.0014643 | 0.5990938 | 0.5514864 |
| 1.0002075 | 0.5995861 | 0.3888561 |
| 0.1143334 | 0.5990517 | 0.5508340 |
| 0.2210006 | 0.5955868 | 0.3922019 |
| 0.3273519 | 0.5894415 | 0.3955756 |
| 0.5460446 | 0.6071510 | 0.3908968 |
| 0.6608960 | 0.6043746 | 0.3908901 |
| 0.7842869 | 0.5990238 | 0.5506868 |

|           |           |           |
|-----------|-----------|-----------|
| 0.8884497 | 0.6006373 | 0.3892110 |
| 0.9973954 | 0.9996495 | 0.5512672 |
| 0.0031722 | 0.9974035 | 0.3886276 |
| 0.1075107 | 1.0010429 | 0.5523889 |
| 0.2252282 | 0.9969540 | 0.3896936 |
| 0.3303461 | 0.0031617 | 0.5499626 |
| 0.3360678 | 0.9981923 | 0.3895095 |
| 0.4422134 | 0.9949631 | 0.5478151 |
| 0.5581472 | 0.0038280 | 0.3877529 |
| 0.6654483 | 0.9959281 | 0.5504857 |
| 0.6688828 | 0.0021279 | 0.3885280 |
| 0.7764985 | 0.9972039 | 0.5509699 |
| 0.8911835 | 0.9992393 | 0.3888792 |
| 0.1605625 | 0.4984885 | 0.5506445 |
| 0.0538742 | 0.4983441 | 0.3893846 |
| 0.1645353 | 0.4962092 | 0.3906646 |
| 0.3864937 | 0.4971016 | 0.3952184 |
| 0.9461425 | 0.4993059 | 0.5514406 |
| 0.8325261 | 0.4987646 | 0.5510614 |
| 0.7185121 | 0.5034550 | 0.3912733 |
| 0.8310023 | 0.5017045 | 0.3900419 |

(10) The optimized final3 geometry

106

Direct

|           |           |           |
|-----------|-----------|-----------|
| 0.2742766 | 0.0961759 | 0.5512173 |
| 0.1641027 | 0.1028839 | 0.5512758 |
| 0.0557304 | 0.0997816 | 0.3891918 |
| 0.1669944 | 0.0997498 | 0.3893982 |
| 0.6084796 | 0.0921806 | 0.5506666 |
| 0.4961040 | 0.0898512 | 0.5508363 |
| 0.3890730 | 0.0998386 | 0.3896808 |
| 0.5003065 | 0.0998746 | 0.3896727 |
| 0.9404063 | 0.1023854 | 0.5512752 |
| 0.8287815 | 0.0990314 | 0.5510526 |
| 0.7223797 | 0.0998968 | 0.3891023 |
| 0.8335959 | 0.0998344 | 0.3889810 |
| 0.9990668 | 0.2026321 | 0.5515504 |
| 0.0003448 | 0.1998331 | 0.3893473 |
| 0.2772889 | 0.2917750 | 0.5513016 |
| 0.1709094 | 0.3026104 | 0.5516841 |
| 0.0558320 | 0.2998064 | 0.3896727 |
| 0.1670482 | 0.2997850 | 0.3902909 |

|           |           |           |
|-----------|-----------|-----------|
| 0.1105689 | 0.2032397 | 0.5515819 |
| 0.2224788 | 0.1997591 | 0.3900603 |
| 0.3334100 | 0.1960116 | 0.5512211 |
| 0.3336472 | 0.1998005 | 0.3905448 |
| 0.3891033 | 0.2997952 | 0.3922853 |
| 0.5003397 | 0.2998329 | 0.3926982 |
| 0.4406101 | 0.1841252 | 0.5508429 |
| 0.5557831 | 0.1998738 | 0.3908590 |
| 0.6664892 | 0.1875573 | 0.5504141 |
| 0.6669929 | 0.1999432 | 0.3903038 |
| 0.9465183 | 0.3035744 | 0.5516527 |
| 0.8330404 | 0.3022256 | 0.5513114 |
| 0.7225031 | 0.2999363 | 0.3908486 |
| 0.8337336 | 0.2998833 | 0.3897914 |
| 0.7736454 | 0.2000820 | 0.5510237 |
| 0.8890995 | 0.1998894 | 0.3893216 |
| 0.0058950 | 0.4034436 | 0.5517493 |
| 0.0003879 | 0.3998487 | 0.3895654 |
| 0.1185349 | 0.4064474 | 0.5518264 |
| 0.2224250 | 0.3997635 | 0.3913418 |
| 0.3336606 | 0.3997734 | 0.3929674 |
| 0.5558023 | 0.3998800 | 0.3936319 |
| 0.6670883 | 0.3999095 | 0.3924645 |
| 0.7899688 | 0.4036155 | 0.5509917 |
| 0.8891359 | 0.3999176 | 0.3896825 |
| 0.2674975 | 0.8989236 | 0.5511497 |
| 0.1593886 | 0.9078911 | 0.5509435 |
| 0.0557443 | 0.8998147 | 0.3887955 |
| 0.1669614 | 0.8997899 | 0.3889777 |
| 0.6016402 | 0.8863131 | 0.5507842 |
| 0.4847035 | 0.8818852 | 0.5510059 |
| 0.3890490 | 0.8998364 | 0.3891118 |
| 0.5002642 | 0.8998700 | 0.3891583 |
| 0.9431737 | 0.9011782 | 0.5508574 |
| 0.8319282 | 0.8988079 | 0.5506981 |
| 0.7224329 | 0.8999467 | 0.3887232 |
| 0.8336413 | 0.8999092 | 0.3886371 |
| 0.0019094 | 0.8024819 | 0.5509213 |
| 0.0003393 | 0.7997831 | 0.3887080 |
| 0.3890604 | 0.6999012 | 0.3913077 |
| 0.1867880 | 0.7190916 | 0.5513431 |
| 0.0557657 | 0.6997994 | 0.3890018 |
| 0.1669809 | 0.6997741 | 0.3895867 |
| 0.1127908 | 0.8049046 | 0.5510660 |

|           |            |           |
|-----------|------------|-----------|
| 0.2224011 | 0.7998021  | 0.3892412 |
| 0.3014570 | 0.7872391  | 0.5514165 |
| 0.3335882 | 0.7998503  | 0.3896242 |
| 0.4124309 | 0.7895004  | 0.5512451 |
| 0.5003078 | 0.6999478  | 0.3917315 |
| 0.5003580 | 0.4999065  | 0.3940760 |
| 0.5557470 | 0.7999276  | 0.3899647 |
| 0.6684870 | 0.7989126  | 0.5503176 |
| 0.6669733 | 0.7999322  | 0.3895717 |
| 0.9507627 | 0.7018976  | 0.5510534 |
| 0.8375652 | 0.6995298  | 0.5506917 |
| 0.7224619 | 0.6999709  | 0.3902786 |
| 0.8336904 | 0.6999171  | 0.3892715 |
| 0.7771226 | 0.7980141  | 0.5505157 |
| 0.8891176 | 0.7998210  | 0.3887014 |
| 0.0135105 | 0.6065616  | 0.5514238 |
| 0.0003476 | 0.5998296  | 0.3891867 |
| 0.1323563 | 0.6118710  | 0.5516518 |
| 0.2224232 | 0.5998141  | 0.3907962 |
| 0.3336301 | 0.5998777  | 0.3922967 |
| 0.5557801 | 0.5999410  | 0.3930928 |
| 0.6670548 | 0.5999591  | 0.3920985 |
| 0.7907006 | 0.6004171  | 0.5505497 |
| 0.8891152 | 0.5998756  | 0.3893603 |
| 0.9952327 | 0.0031088  | 0.5510173 |
| 0.0003149 | -0.0001992 | 0.3888567 |
| 0.1056294 | 0.0052026  | 0.5510271 |
| 0.2224110 | -0.0002106 | 0.3891216 |
| 0.3278175 | 0.9945722  | 0.5511104 |
| 0.3336441 | -0.0001666 | 0.3891128 |
| 0.4379930 | 0.9879799  | 0.5510362 |
| 0.5556885 | -0.0000932 | 0.3890146 |
| 0.6608911 | 0.9904368  | 0.5507684 |
| 0.6669838 | -0.0000586 | 0.3888157 |
| 0.7731734 | 0.9965405  | 0.5508006 |
| 0.8890390 | -0.0001529 | 0.3887042 |
| 0.1700765 | 0.5057291  | 0.5516185 |
| 0.0557857 | 0.4998172  | 0.3896164 |
| 0.1670374 | 0.4998055  | 0.3906596 |
| 0.3890839 | 0.4998586  | 0.3937039 |
| 0.9566188 | 0.5055364  | 0.5515418 |
| 0.8420101 | 0.5025822  | 0.5511134 |
| 0.7224866 | 0.4999438  | 0.3917236 |
| 0.8337213 | 0.4998845  | 0.3900841 |

**2. The geometries of the evolution process in Fig. 4.(Direct coordinates, the order of the structure is from left to right)**

(1) The optimized geometry of V6+V8

106

Direct

|           |           |           |
|-----------|-----------|-----------|
| 0.2750773 | 0.0968231 | 0.5523152 |
| 0.1642179 | 0.0978702 | 0.5524659 |
| 0.0641630 | 0.1015448 | 0.3898576 |
| 0.1778995 | 0.1029916 | 0.3902507 |
| 0.6088035 | 0.1007070 | 0.5499254 |
| 0.4967211 | 0.1050025 | 0.5500991 |
| 0.3960392 | 0.0996891 | 0.3907457 |
| 0.5060882 | 0.0956622 | 0.3907937 |
| 0.9433544 | 0.0987078 | 0.5515649 |
| 0.8324746 | 0.0982745 | 0.5509065 |
| 0.7260101 | 0.0996200 | 0.3897601 |
| 0.8377767 | 0.0994646 | 0.3896368 |
| 0.0000101 | 0.1986686 | 0.5520054 |
| 0.0038693 | 0.2004676 | 0.3898023 |
| 0.2757454 | 0.2965479 | 0.5518717 |
| 0.1673430 | 0.2985025 | 0.5523897 |
| 0.0581697 | 0.3004856 | 0.3897995 |
| 0.1730712 | 0.3012893 | 0.3900408 |
| 0.1105025 | 0.1983233 | 0.5524503 |
| 0.2388459 | 0.2052052 | 0.3903303 |
| 0.3278356 | 0.1955007 | 0.5518035 |
| 0.3537082 | 0.2051297 | 0.3906504 |
| 0.4471421 | 0.3274827 | 0.5493790 |
| 0.4822759 | 0.2867563 | 0.3908244 |
| 0.4379991 | 0.2078474 | 0.5504711 |
| 0.5546492 | 0.1966636 | 0.3904296 |
| 0.6705234 | 0.1926883 | 0.5498350 |
| 0.6661487 | 0.1989551 | 0.3901705 |
| 0.9476329 | 0.2998929 | 0.5520052 |
| 0.8351646 | 0.3000997 | 0.5514898 |
| 0.7176994 | 0.2999294 | 0.3901706 |

|           |           |           |
|-----------|-----------|-----------|
| 0.8310673 | 0.2998689 | 0.3897394 |
| 0.7775869 | 0.1991743 | 0.5507608 |
| 0.8911940 | 0.2006661 | 0.3896777 |
| 0.0054639 | 0.3997797 | 0.5522214 |
| 0.9985133 | 0.3994757 | 0.3896305 |
| 0.1180154 | 0.4008904 | 0.5521732 |
| 0.2176673 | 0.4014494 | 0.3901883 |
| 0.3477736 | 0.3870684 | 0.5504198 |
| 0.5388078 | 0.3850487 | 0.3908739 |
| 0.6524588 | 0.3965762 | 0.3906504 |
| 0.7867277 | 0.3989542 | 0.5514128 |
| 0.8848026 | 0.4000186 | 0.3896208 |
| 0.2750612 | 0.9000013 | 0.5522103 |
| 0.1642089 | 0.8990862 | 0.5523528 |
| 0.0639395 | 0.8974531 | 0.3897065 |
| 0.1776639 | 0.8959951 | 0.3901494 |
| 0.6087879 | 0.8963180 | 0.5498253 |
| 0.4967448 | 0.8919192 | 0.5500311 |
| 0.3959148 | 0.8990982 | 0.3907304 |
| 0.5059964 | 0.9028792 | 0.3907432 |
| 0.9434081 | 0.8983178 | 0.5514607 |
| 0.8325158 | 0.8988413 | 0.5507795 |
| 0.7258481 | 0.8987329 | 0.3896688 |
| 0.8375704 | 0.8991694 | 0.3895189 |
| 0.0000636 | 0.7983353 | 0.5518143 |
| 0.0035292 | 0.7985170 | 0.3895384 |
| 0.2757484 | 0.7003354 | 0.5516802 |
| 0.1673359 | 0.6984419 | 0.5522067 |
| 0.0578176 | 0.6985691 | 0.3895365 |
| 0.1726752 | 0.6977440 | 0.3898293 |
| 0.1105434 | 0.7986527 | 0.5522626 |
| 0.2384257 | 0.7938008 | 0.3901986 |
| 0.3278612 | 0.8013766 | 0.5516111 |
| 0.3532014 | 0.7938528 | 0.3906155 |
| 0.4380263 | 0.7890632 | 0.5503474 |
| 0.4825241 | 0.7115816 | 0.3907553 |
| 0.4471151 | 0.6694772 | 0.5493444 |
| 0.5545316 | 0.8018518 | 0.3902799 |
| 0.6705448 | 0.8043747 | 0.5496199 |
| 0.6659714 | 0.7993839 | 0.3900275 |
| 0.9476744 | 0.6971145 | 0.5517729 |
| 0.8351815 | 0.6969492 | 0.5512294 |
| 0.7174612 | 0.6983782 | 0.3900319 |
| 0.8308033 | 0.6986645 | 0.3895454 |

|            |            |           |
|------------|------------|-----------|
| 0.7776197  | 0.7979409  | 0.5505283 |
| 0.8908832  | 0.7979990  | 0.3894489 |
| 0.0054684  | 0.5971843  | 0.5520931 |
| -0.0016958 | 0.5995096  | 0.3894717 |
| 0.1180178  | 0.5960472  | 0.5520685 |
| 0.2175285  | 0.5977075  | 0.3900488 |
| 0.3477605  | 0.6098076  | 0.5503291 |
| 0.5388661  | 0.6133029  | 0.3909070 |
| 0.6524012  | 0.6015862  | 0.3906332 |
| 0.7867334  | 0.5980783  | 0.5512376 |
| 0.8846254  | 0.5986009  | 0.3894910 |
| -0.0018969 | -0.0014829 | 0.5518115 |
| 0.0087588  | 0.9994935  | 0.3896355 |
| 0.1087047  | -0.0015223 | 0.5522994 |
| 0.2295637  | 0.9994550  | 0.3903479 |
| 0.3319672  | 0.9983944  | 0.5518197 |
| 0.3393513  | -0.0005618 | 0.3906734 |
| 0.4430839  | 0.9984213  | 0.5507570 |
| 0.5623015  | -0.0007597 | 0.3904726 |
| 0.6640319  | 0.9985054  | 0.5501116 |
| 0.6727399  | -0.0008108 | 0.3898930 |
| 0.7755686  | -0.0014526 | 0.5505258 |
| 0.8951644  | -0.0006639 | 0.3895190 |
| 0.1810762  | 0.4984509  | 0.5517755 |
| 0.0527584  | 0.4995617  | 0.3895458 |
| 0.1663650  | 0.4995550  | 0.3898624 |
| 0.3005191  | 0.4984098  | 0.5506815 |
| 0.9497625  | 0.4984880  | 0.5521353 |
| 0.8361740  | 0.4985102  | 0.5517885 |
| 0.7090731  | 0.4990964  | 0.3903626 |
| 0.8246366  | 0.4992372  | 0.3897116 |

(2) The structure of TS between V6+V8 and Intermediate

106

Direct

|           |           |           |
|-----------|-----------|-----------|
| 0.2978497 | 0.0814018 | 0.5532345 |
| 0.1870217 | 0.0824044 | 0.5556189 |
| 0.0424930 | 0.1156907 | 0.3909417 |
| 0.1564178 | 0.1171650 | 0.3908678 |
| 0.6315088 | 0.0853745 | 0.5484331 |
| 0.5194789 | 0.0895798 | 0.5474036 |
| 0.3744591 | 0.1138590 | 0.3881119 |
| 0.4844210 | 0.1098125 | 0.3867618 |
| 0.9660211 | 0.0832191 | 0.5561515 |



|           |           |           |
|-----------|-----------|-----------|
| 0.8551042 | 0.0828741 | 0.5542187 |
| 0.7042688 | 0.1140379 | 0.3878162 |
| 0.8160390 | 0.1137097 | 0.3892898 |
| 0.0228151 | 0.1832541 | 0.5568701 |
| 0.9819824 | 0.2145528 | 0.3913285 |
| 0.2983533 | 0.2812079 | 0.5526850 |
| 0.1900161 | 0.2831839 | 0.5550806 |
| 0.0361298 | 0.3145982 | 0.3912348 |
| 0.1511392 | 0.3153245 | 0.3908722 |
| 0.1332540 | 0.1829412 | 0.5565614 |
| 0.2172621 | 0.2194405 | 0.3909571 |
| 0.3505260 | 0.1801573 | 0.5520232 |
| 0.3324369 | 0.2194959 | 0.3902154 |
| 0.4695638 | 0.3119216 | 0.5466627 |
| 0.4598783 | 0.3002603 | 0.3904126 |
| 0.4605606 | 0.1926428 | 0.5485844 |
| 0.5327830 | 0.2107204 | 0.3885687 |
| 0.6932906 | 0.1774788 | 0.5506711 |
| 0.6442249 | 0.2132991 | 0.3894948 |
| 0.9704384 | 0.2845502 | 0.5565698 |
| 0.8579293 | 0.2847638 | 0.5558939 |
| 0.6955101 | 0.3143699 | 0.3915460 |
| 0.8089252 | 0.3142144 | 0.3914994 |
| 0.8002166 | 0.1838594 | 0.5539019 |
| 0.8691973 | 0.2149569 | 0.3909556 |
| 0.0282094 | 0.3844767 | 0.5557106 |
| 0.9763676 | 0.4136013 | 0.3909024 |
| 0.1407383 | 0.3855751 | 0.5543393 |
| 0.1956181 | 0.4155091 | 0.3897436 |
| 0.3701809 | 0.3716483 | 0.5489195 |
| 0.5163275 | 0.3985306 | 0.3914904 |
| 0.6298981 | 0.4109828 | 0.3918855 |
| 0.8096232 | 0.3836348 | 0.5558851 |
| 0.8625266 | 0.4144419 | 0.3913579 |
| 0.2978542 | 0.8845964 | 0.5502503 |
| 0.1870971 | 0.8836718 | 0.5529160 |
| 0.0425952 | 0.9114963 | 0.3894926 |
| 0.1564912 | 0.9100272 | 0.3894840 |
| 0.6315336 | 0.8810266 | 0.5467132 |
| 0.5195217 | 0.8765034 | 0.5455034 |
| 0.3744914 | 0.9134611 | 0.3865279 |
| 0.4844019 | 0.9175208 | 0.3843030 |
| 0.9659909 | 0.8829251 | 0.5545084 |
| 0.8551292 | 0.8835252 | 0.5527377 |

|           |           |           |
|-----------|-----------|-----------|
| 0.7042746 | 0.9131532 | 0.3853041 |
| 0.8160603 | 0.9134259 | 0.3872975 |
| 0.0228026 | 0.7829036 | 0.5537789 |
| 0.9820757 | 0.8126137 | 0.3889460 |
| 0.2984136 | 0.6849169 | 0.5472408 |
| 0.1900843 | 0.6830301 | 0.5506960 |
| 0.0362546 | 0.7126131 | 0.3889359 |
| 0.1512523 | 0.7119273 | 0.3885693 |
| 0.1332923 | 0.7831862 | 0.5526146 |
| 0.2173632 | 0.8078314 | 0.3886738 |
| 0.3506063 | 0.7858950 | 0.5468801 |
| 0.3325632 | 0.8076725 | 0.3879747 |
| 0.4607751 | 0.7733706 | 0.5449629 |
| 0.4596453 | 0.7272387 | 0.3869206 |
| 0.4697775 | 0.6537933 | 0.5439241 |
| 0.5327424 | 0.8165190 | 0.3842732 |
| 0.6933368 | 0.7889721 | 0.5475764 |
| 0.6442367 | 0.8139392 | 0.3851542 |
| 0.9704119 | 0.6817457 | 0.5536875 |
| 0.8578411 | 0.6815794 | 0.5530679 |
| 0.6955227 | 0.7129873 | 0.3880560 |
| 0.8089761 | 0.7130363 | 0.3885854 |
| 0.8001947 | 0.7825924 | 0.5510427 |
| 0.8693032 | 0.8122585 | 0.3881921 |
| 0.0282266 | 0.5818635 | 0.5539360 |
| 0.9764712 | 0.6136273 | 0.3895056 |
| 0.1407265 | 0.5806746 | 0.5520759 |
| 0.1956979 | 0.6117049 | 0.3883128 |
| 0.3705090 | 0.5943155 | 0.5457034 |
| 0.5161067 | 0.6291707 | 0.3902199 |
| 0.6299564 | 0.6165891 | 0.3902414 |
| 0.8095279 | 0.5827869 | 0.5541094 |
| 0.8626270 | 0.6129065 | 0.3898082 |
| 0.0208162 | 0.9830362 | 0.5558050 |
| 0.9872606 | 0.0135576 | 0.3899020 |
| 0.1315127 | 0.9830282 | 0.5553247 |
| 0.2081723 | 0.0136385 | 0.3897411 |
| 0.3546563 | 0.9830058 | 0.5501245 |
| 0.3179359 | 0.0136196 | 0.3880771 |
| 0.4657971 | 0.9830530 | 0.5472728 |
| 0.5407296 | 0.0136781 | 0.3847196 |
| 0.6867203 | 0.9831935 | 0.5488478 |
| 0.6511634 | 0.0136606 | 0.3852835 |
| 0.7981996 | 0.9832223 | 0.5518394 |

|           |           |           |
|-----------|-----------|-----------|
| 0.8735734 | 0.0135377 | 0.3887604 |
| 0.2037732 | 0.4830711 | 0.5514886 |
| 0.0307081 | 0.5135811 | 0.3898967 |
| 0.1443863 | 0.5136015 | 0.3891670 |
| 0.3231016 | 0.4829077 | 0.5482119 |
| 0.9725297 | 0.4831603 | 0.5552583 |
| 0.8589396 | 0.4831929 | 0.5555779 |
| 0.6863424 | 0.5138319 | 0.3914500 |
| 0.8022901 | 0.5137159 | 0.3909114 |

(3) The structure of intermediate between V6+V8 and V5+V9

106

Direct

|            |           |           |
|------------|-----------|-----------|
| 0.3399873  | 0.0520877 | 0.5590543 |
| 0.2293618  | 0.0524013 | 0.5625364 |
| 0.0037289  | 0.1431145 | 0.3931486 |
| 0.1173680  | 0.1444388 | 0.3942148 |
| 0.6742300  | 0.0616089 | 0.5475764 |
| 0.5616525  | 0.0678800 | 0.5459363 |
| 0.3358044  | 0.1420761 | 0.3899474 |
| 0.4455875  | 0.1390713 | 0.3849910 |
| 0.0092183  | 0.0539895 | 0.5611415 |
| 0.8986251  | 0.0553090 | 0.5575882 |
| 0.6651806  | 0.1421772 | 0.3857942 |
| 0.7770423  | 0.1415977 | 0.3885848 |
| 0.0643017  | 0.1538399 | 0.5638221 |
| 0.9433096  | 0.2420744 | 0.3938169 |
| 0.3368390  | 0.2507234 | 0.5570116 |
| 0.2290715  | 0.2528610 | 0.5618088 |
| -0.0024009 | 0.3420813 | 0.3947237 |
| 0.1124237  | 0.3428685 | 0.3951659 |
| 0.1743182  | 0.1525115 | 0.5647098 |
| 0.1782128  | 0.2466698 | 0.3958043 |
| 0.3912702  | 0.1515314 | 0.5569966 |
| 0.2926164  | 0.2469651 | 0.3959183 |
| 0.5054011  | 0.2854626 | 0.5376326 |
| 0.4247216  | 0.3315556 | 0.3968139 |
| 0.5006349  | 0.1685146 | 0.5464870 |
| 0.4938453  | 0.2410554 | 0.3882754 |
| 0.7363987  | 0.1521052 | 0.5517328 |
| 0.6057493  | 0.2418298 | 0.3891526 |
| 0.0110386  | 0.2552852 | 0.5626529 |
| 0.8994322  | 0.2568067 | 0.5601638 |
| 0.6574587  | 0.3424665 | 0.3942982 |

|            |           |           |
|------------|-----------|-----------|
| 0.7708977  | 0.3419504 | 0.3943165 |
| 0.8432293  | 0.1560712 | 0.5570454 |
| 0.8306753  | 0.2425041 | 0.3923536 |
| 0.0671765  | 0.3551195 | 0.5605324 |
| 0.9382786  | 0.4412230 | 0.3941451 |
| 0.1782351  | 0.3542569 | 0.5580324 |
| 0.1570936  | 0.4429128 | 0.3933022 |
| 0.4037959  | 0.3410323 | 0.5414416 |
| 0.4774826  | 0.4350277 | 0.4074126 |
| 0.5941993  | 0.4390419 | 0.4000118 |
| 0.8509914  | 0.3560333 | 0.5587896 |
| 0.8247757  | 0.4419843 | 0.3953110 |
| 0.3437055  | 0.8530918 | 0.5482050 |
| 0.2326955  | 0.8528881 | 0.5529787 |
| 0.0037995  | 0.9392755 | 0.3904388 |
| 0.1175346  | 0.9377843 | 0.3915901 |
| 0.6763617  | 0.8585664 | 0.5454529 |
| 0.5636989  | 0.8608272 | 0.5425492 |
| 0.3358181  | 0.9408633 | 0.3874893 |
| 0.4456152  | 0.9444460 | 0.3823905 |
| 0.0099847  | 0.8539400 | 0.5560963 |
| 0.8986010  | 0.8560392 | 0.5538448 |
| 0.6652208  | 0.9408861 | 0.3828528 |
| 0.7771416  | 0.9411752 | 0.3856301 |
| 0.0672474  | 0.7537139 | 0.5536850 |
| 0.9434303  | 0.8403935 | 0.3893065 |
| 0.3437101  | 0.6515438 | 0.5250242 |
| 0.2355237  | 0.6523869 | 0.5404805 |
| -0.0022625 | 0.7403928 | 0.3902691 |
| 0.1126136  | 0.7394629 | 0.3908461 |
| 0.1788998  | 0.7526400 | 0.5505386 |
| 0.1784718  | 0.8355830 | 0.3915287 |
| 0.3992547  | 0.7518011 | 0.5357527 |
| 0.2930546  | 0.8355344 | 0.3915701 |
| 0.5067114  | 0.7667527 | 0.5361897 |
| 0.4242314  | 0.7522426 | 0.3920537 |
| 0.4369459  | 0.5434906 | 0.4347556 |
| 0.4938690  | 0.8423744 | 0.3836097 |
| 0.7355395  | 0.7650633 | 0.5470189 |
| 0.6057036  | 0.8411815 | 0.3839486 |
| 0.0127122  | 0.6539996 | 0.5528636 |
| 0.8997798  | 0.6546248 | 0.5531962 |
| 0.6574511  | 0.7405504 | 0.3888321 |
| 0.7709293  | 0.7407681 | 0.3889719 |

|            |           |           |
|------------|-----------|-----------|
| 0.8426092  | 0.7561360 | 0.5513545 |
| 0.8307918  | 0.8400830 | 0.3874441 |
| 0.0697748  | 0.5536375 | 0.5523721 |
| 0.9383391  | 0.6414165 | 0.3912930 |
| 0.1810358  | 0.5513050 | 0.5449894 |
| 0.1572379  | 0.6392995 | 0.3907784 |
| 0.3861592  | 0.5465052 | 0.4963859 |
| 0.4771462  | 0.6494108 | 0.4041790 |
| 0.5941479  | 0.6445838 | 0.3968627 |
| 0.8510495  | 0.5559624 | 0.5548818 |
| 0.8248607  | 0.6408487 | 0.3922188 |
| 0.0647603  | 0.9535124 | 0.5594012 |
| 0.9482252  | 0.0411926 | 0.3906140 |
| 0.1756581  | 0.9524985 | 0.5592984 |
| 0.1694987  | 0.0411608 | 0.3924242 |
| 0.3977854  | 0.9541621 | 0.5515972 |
| 0.2793575  | 0.0413709 | 0.3895549 |
| 0.5083852  | 0.9637242 | 0.5465538 |
| 0.5012680  | 0.0418234 | 0.3813677 |
| 0.7309245  | 0.9592322 | 0.5486170 |
| 0.6120011  | 0.0416438 | 0.3819030 |
| 0.8420428  | 0.9565976 | 0.5533072 |
| 0.8345600  | 0.0413349 | 0.3879422 |
| 0.2383534  | 0.4499996 | 0.5458334 |
| -0.0074863 | 0.5412484 | 0.3923306 |
| 0.1060357  | 0.5411071 | 0.3914368 |
| 0.3499401  | 0.4441707 | 0.5303662 |
| 0.0133149  | 0.4549369 | 0.5571931 |
| 0.8999857  | 0.4558046 | 0.5577299 |
| 0.6503499  | 0.5418018 | 0.3994671 |
| 0.7653321  | 0.5415394 | 0.3959528 |

(4) The structure of TS between intermediate and V5+V9

106

Direct

|           |           |           |
|-----------|-----------|-----------|
| 0.3155997 | 0.0679536 | 0.5577675 |
| 0.2050999 | 0.0685263 | 0.5601806 |
| 0.0266428 | 0.1276319 | 0.3914993 |
| 0.1406478 | 0.1291237 | 0.3926520 |
| 0.6501718 | 0.0782618 | 0.5489956 |
| 0.5377043 | 0.0843061 | 0.5483041 |
| 0.3585889 | 0.1259246 | 0.3901543 |
| 0.4677940 | 0.1225838 | 0.3871295 |
| 0.9850936 | 0.0704944 | 0.5589528 |

|           |           |           |
|-----------|-----------|-----------|
| 0.8745742 | 0.0719133 | 0.5561845 |
| 0.6872295 | 0.1268680 | 0.3872283 |
| 0.7993467 | 0.1261312 | 0.3886030 |
| 0.0401678 | 0.1704139 | 0.5609470 |
| 0.9657516 | 0.2266037 | 0.3921033 |
| 0.3130263 | 0.2660460 | 0.5556319 |
| 0.2051614 | 0.2688616 | 0.5594743 |
| 0.0201416 | 0.3265408 | 0.3927170 |
| 0.1353081 | 0.3272702 | 0.3934007 |
| 0.1501471 | 0.1688237 | 0.5616437 |
| 0.2021367 | 0.2316515 | 0.3943087 |
| 0.3672503 | 0.1669218 | 0.5562393 |
| 0.3176048 | 0.2330142 | 0.3946856 |
| 0.4821698 | 0.3020434 | 0.5419876 |
| 0.4417478 | 0.3125209 | 0.3966841 |
| 0.4767151 | 0.1839973 | 0.5488229 |
| 0.5147824 | 0.2254356 | 0.3907451 |
| 0.7122194 | 0.1690177 | 0.5515960 |
| 0.6269284 | 0.2265075 | 0.3908030 |
| 0.9870576 | 0.2717965 | 0.5600718 |
| 0.8753999 | 0.2734314 | 0.5577962 |
| 0.6785604 | 0.3274535 | 0.3941467 |
| 0.7924241 | 0.3266334 | 0.3929743 |
| 0.8191037 | 0.1727368 | 0.5553944 |
| 0.8528606 | 0.2271963 | 0.3913102 |
| 0.0432148 | 0.3715344 | 0.5590287 |
| 0.9604282 | 0.4255533 | 0.3917547 |
| 0.1542597 | 0.3705439 | 0.5574160 |
| 0.1795109 | 0.4274185 | 0.3913376 |
| 0.3816166 | 0.3557202 | 0.5444154 |
| 0.4947866 | 0.4215969 | 0.4021716 |
| 0.6145422 | 0.4241912 | 0.3972111 |
| 0.8269754 | 0.3724932 | 0.5563563 |
| 0.8465235 | 0.4265977 | 0.3927246 |
| 0.3198975 | 0.8696056 | 0.5482706 |
| 0.2087308 | 0.8691964 | 0.5524407 |
| 0.0269302 | 0.9233107 | 0.3890609 |
| 0.1409971 | 0.9216713 | 0.3900482 |
| 0.6524965 | 0.8755146 | 0.5471079 |
| 0.5400884 | 0.8778818 | 0.5448252 |
| 0.3587996 | 0.9255966 | 0.3872482 |
| 0.4678807 | 0.9297075 | 0.3838815 |
| 0.9859072 | 0.8703127 | 0.5554915 |
| 0.8745092 | 0.8725349 | 0.5537119 |

|           |           |           |
|-----------|-----------|-----------|
| 0.6873219 | 0.9251596 | 0.3843905 |
| 0.7994553 | 0.9254880 | 0.3860388 |
| 0.0432964 | 0.7699408 | 0.5540299 |
| 0.9661032 | 0.8245041 | 0.3880722 |
| 0.3228744 | 0.6656138 | 0.5323608 |
| 0.2119960 | 0.6679161 | 0.5448178 |
| 0.0205218 | 0.7244782 | 0.3885465 |
| 0.1357999 | 0.7235633 | 0.3887479 |
| 0.1549548 | 0.7684770 | 0.5509630 |
| 0.2027903 | 0.8190184 | 0.3896245 |
| 0.3764939 | 0.7691698 | 0.5381854 |
| 0.3184925 | 0.8179291 | 0.3896853 |
| 0.4833756 | 0.7830884 | 0.5393744 |
| 0.4419828 | 0.7401879 | 0.3906513 |
| 0.4522031 | 0.5284999 | 0.4125364 |
| 0.5150430 | 0.8268877 | 0.3852198 |
| 0.7113912 | 0.7817071 | 0.5484585 |
| 0.6271810 | 0.8255767 | 0.3854530 |
| 0.9887378 | 0.6701303 | 0.5539869 |
| 0.8756137 | 0.6710013 | 0.5536524 |
| 0.6789979 | 0.7248693 | 0.3887729 |
| 0.7928054 | 0.7251265 | 0.3883332 |
| 0.8184471 | 0.7725898 | 0.5518602 |
| 0.8531903 | 0.8243255 | 0.3871236 |
| 0.0455636 | 0.5700833 | 0.5542190 |
| 0.9606160 | 0.6256637 | 0.3892941 |
| 0.1580682 | 0.5676914 | 0.5496511 |
| 0.1798494 | 0.6232107 | 0.3884942 |
| 0.3719680 | 0.5632443 | 0.5202193 |
| 0.4957971 | 0.6328462 | 0.3980088 |
| 0.6149964 | 0.6288390 | 0.3935323 |
| 0.8270385 | 0.5723999 | 0.5542263 |
| 0.8467115 | 0.6250743 | 0.3900986 |
| 0.0405047 | 0.9698960 | 0.5579521 |
| 0.9711833 | 0.0255064 | 0.3893338 |
| 0.1515479 | 0.9685501 | 0.5578278 |
| 0.1922294 | 0.0254676 | 0.3912236 |
| 0.3738040 | 0.9705172 | 0.5519287 |
| 0.3021168 | 0.0257041 | 0.3893201 |
| 0.4844663 | 0.9799476 | 0.5485665 |
| 0.5238646 | 0.0262354 | 0.3837000 |
| 0.7069372 | 0.9761157 | 0.5496723 |
| 0.6345185 | 0.0261322 | 0.3841748 |
| 0.8181037 | 0.9731603 | 0.5531470 |

|           |           |           |
|-----------|-----------|-----------|
| 0.8570761 | 0.0257247 | 0.3876185 |
| 0.2147365 | 0.4668768 | 0.5500954 |
| 0.0146564 | 0.5255100 | 0.3900833 |
| 0.1282893 | 0.5253812 | 0.3894181 |
| 0.3291564 | 0.4620750 | 0.5383897 |
| 0.9893227 | 0.4714907 | 0.5569605 |
| 0.8758558 | 0.4722943 | 0.5563303 |
| 0.6707292 | 0.5262989 | 0.3955215 |
| 0.7869383 | 0.5259213 | 0.3928332 |

(5) The structure of V5+V9

106

Direct

|            |           |           |
|------------|-----------|-----------|
| 0.2745051  | 0.0958960 | 0.5526806 |
| 0.1640119  | 0.0962748 | 0.5530136 |
| 0.0646372  | 0.1018998 | 0.3900944 |
| 0.1788187  | 0.1035455 | 0.3905526 |
| 0.6094628  | 0.1050583 | 0.5489005 |
| 0.4970657  | 0.1116311 | 0.5488048 |
| 0.3963585  | 0.0997289 | 0.3913974 |
| 0.5056606  | 0.0956798 | 0.3917606 |
| 0.9442992  | 0.0978101 | 0.5516997 |
| 0.8338353  | 0.0990414 | 0.5506341 |
| 0.7250426  | 0.1004189 | 0.3902422 |
| 0.8372399  | 0.0998972 | 0.3899143 |
| -0.0007118 | 0.1978085 | 0.5524924 |
| 0.0038304  | 0.2006346 | 0.3901770 |
| 0.2725937  | 0.2933848 | 0.5519991 |
| 0.1644403  | 0.2962003 | 0.5530369 |
| 0.0582737  | 0.3005237 | 0.3903198 |
| 0.1734386  | 0.3013714 | 0.3906688 |
| 0.1092697  | 0.1963914 | 0.5532251 |
| 0.2404175  | 0.2060238 | 0.3909034 |
| 0.3264042  | 0.1944452 | 0.5519342 |
| 0.3563615  | 0.2072956 | 0.3912685 |
| 0.4428911  | 0.3297772 | 0.5463158 |
| 0.4783971  | 0.2846093 | 0.3919563 |
| 0.4366122  | 0.2112912 | 0.5489989 |
| 0.5523655  | 0.1985003 | 0.3914605 |
| 0.6716102  | 0.1956861 | 0.5490210 |
| 0.6648553  | 0.1999282 | 0.3908783 |
| 0.9462133  | 0.2990150 | 0.5523133 |
| 0.8345248  | 0.3006896 | 0.5513194 |
| 0.7167277  | 0.3007498 | 0.3907133 |



|           |           |           |
|-----------|-----------|-----------|
| 0.8305235 | 0.3002109 | 0.3901579 |
| 0.7785482 | 0.1998337 | 0.5503363 |
| 0.8907731 | 0.2010189 | 0.3900325 |
| 0.0024180 | 0.3987469 | 0.5525901 |
| 0.9985283 | 0.3995714 | 0.3900924 |
| 0.1135578 | 0.3978264 | 0.5524967 |
| 0.2176031 | 0.4016553 | 0.3909817 |
| 0.3426990 | 0.3834959 | 0.5486781 |
| 0.5324612 | 0.3941115 | 0.3915796 |
| 0.6527298 | 0.3972747 | 0.3911676 |
| 0.7858477 | 0.3996219 | 0.5509890 |
| 0.8846295 | 0.4004132 | 0.3900417 |
| 0.2789646 | 0.8979494 | 0.5514650 |
| 0.1674696 | 0.8970556 | 0.5519256 |
| 0.0645231 | 0.8975257 | 0.3896355 |
| 0.1786624 | 0.8958873 | 0.3900382 |
| 0.6116746 | 0.9024902 | 0.5490971 |
| 0.4993586 | 0.9052820 | 0.5492331 |
| 0.3962617 | 0.8995372 | 0.3910031 |
| 0.5056116 | 0.9033435 | 0.3912065 |
| 0.9448106 | 0.8976076 | 0.5513250 |
| 0.8334243 | 0.8995613 | 0.5505164 |
| 0.7250948 | 0.8986768 | 0.3899949 |
| 0.8372933 | 0.8993127 | 0.3896107 |
| 0.0020060 | 0.7974674 | 0.5516189 |
| 0.0037952 | 0.7987084 | 0.3894821 |
| 0.2828899 | 0.6947159 | 0.5496902 |
| 0.1707598 | 0.6960323 | 0.5512414 |
| 0.0581836 | 0.6987369 | 0.3895670 |
| 0.1732909 | 0.6979457 | 0.3898558 |
| 0.1135800 | 0.7965164 | 0.5517483 |
| 0.2400111 | 0.7934360 | 0.3900764 |
| 0.3360941 | 0.7977745 | 0.5499932 |
| 0.3558183 | 0.7922541 | 0.3907407 |
| 0.4428549 | 0.8100822 | 0.5493139 |
| 0.4787988 | 0.7142206 | 0.3912866 |
| 0.4899757 | 0.4994624 | 0.3917499 |
| 0.5523966 | 0.8004788 | 0.3909941 |
| 0.6702666 | 0.8086290 | 0.5490295 |
| 0.6649730 | 0.7991286 | 0.3905278 |
| 0.9477459 | 0.6973016 | 0.5516624 |
| 0.8346399 | 0.6980672 | 0.5509663 |
| 0.7167599 | 0.6983415 | 0.3903151 |
| 0.8306264 | 0.6989252 | 0.3896963 |

|            |            |           |
|------------|------------|-----------|
| 0.7775045  | 0.7995707  | 0.5501802 |
| 0.8908494  | 0.7982173  | 0.3894681 |
| 0.0045111  | 0.5973215  | 0.5521093 |
| -0.0014632 | 0.5996647  | 0.3896673 |
| 0.1175228  | 0.5953321  | 0.5517127 |
| 0.2175761  | 0.5976605  | 0.3904661 |
| 0.3336899  | 0.5944373  | 0.5477899 |
| 0.5324776  | 0.6051104  | 0.3914016 |
| 0.6527394  | 0.6018666  | 0.3909666 |
| 0.7858918  | 0.5994746  | 0.5508458 |
| 0.8846745  | 0.5987736  | 0.3897050 |
| -0.0005659 | -0.0027406 | 0.5518533 |
| 0.0090475  | 0.9996665  | 0.3896926 |
| 0.1103381  | -0.0037277 | 0.5524118 |
| 0.2299848  | 0.9996639  | 0.3904644 |
| 0.3329665  | 0.9984508  | 0.5515310 |
| 0.3397838  | -0.0003176 | 0.3909740 |
| 0.4436439  | 0.0072018  | 0.5500709 |
| 0.5617420  | -0.0005978 | 0.3911421 |
| 0.6661426  | 0.0029898  | 0.5493217 |
| 0.6723769  | -0.0005207 | 0.3904294 |
| 0.7773229  | 0.0002104  | 0.5500587 |
| 0.8949263  | 0.9996089  | 0.3896295 |
| 0.1744558  | 0.4946385  | 0.5513756 |
| 0.0526445  | 0.4996011  | 0.3899330 |
| 0.1663723  | 0.4996527  | 0.3903964 |
| 0.2908185  | 0.4907138  | 0.5490777 |
| 0.9483491  | 0.4987135  | 0.5522759 |
| 0.8348223  | 0.4994891  | 0.5515497 |
| 0.7083355  | 0.4995718  | 0.3907490 |
| 0.8251199  | 0.4995700  | 0.3900744 |

(6) The structure of TS between V5+V9 and intermediate

106

Direct

|           |           |           |
|-----------|-----------|-----------|
| 0.2724413 | 0.0921617 | 0.5554322 |
| 0.1620002 | 0.0929719 | 0.5576889 |
| 0.0655431 | 0.1041260 | 0.3917449 |
| 0.1793776 | 0.1054749 | 0.3928102 |
| 0.6071838 | 0.1020803 | 0.5437566 |
| 0.4943354 | 0.1074038 | 0.5416643 |
| 0.3973049 | 0.1030181 | 0.3931823 |
| 0.5072782 | 0.1001585 | 0.3943995 |
| 0.9420411 | 0.0948465 | 0.5547441 |

|           |           |           |
|-----------|-----------|-----------|
| 0.8315026 | 0.0962061 | 0.5514778 |
| 0.7266175 | 0.1037165 | 0.3913534 |
| 0.8387678 | 0.1028241 | 0.3906600 |
| 0.9971370 | 0.1948267 | 0.5563405 |
| 0.0051572 | 0.2030919 | 0.3920973 |
| 0.2707976 | 0.2900569 | 0.5481423 |
| 0.1624702 | 0.2930387 | 0.5537986 |
| 0.0595716 | 0.3030680 | 0.3922914 |
| 0.1742718 | 0.3037472 | 0.3930189 |
| 0.1073063 | 0.1933474 | 0.5575044 |
| 0.2399979 | 0.2077446 | 0.3943877 |
| 0.3245052 | 0.1905333 | 0.5506178 |
| 0.3548608 | 0.2084805 | 0.3947966 |
| 0.4386046 | 0.3207524 | 0.5199577 |
| 0.4809956 | 0.2902629 | 0.4045498 |
| 0.4327613 | 0.2054825 | 0.5388980 |
| 0.5544720 | 0.2019672 | 0.3987026 |
| 0.6689049 | 0.1930385 | 0.5459477 |
| 0.6666443 | 0.2032770 | 0.3950666 |
| 0.9438433 | 0.2959538 | 0.5547729 |
| 0.8320311 | 0.2975568 | 0.5528871 |
| 0.7189436 | 0.3041303 | 0.3942325 |
| 0.8322749 | 0.3032078 | 0.3922447 |
| 0.7758743 | 0.1968690 | 0.5505288 |
| 0.8923505 | 0.2037888 | 0.3917481 |
| 1.0000752 | 0.3955217 | 0.5533151 |
| 0.0002749 | 0.4023582 | 0.3911360 |
| 0.1112781 | 0.3942409 | 0.5510431 |
| 0.2192772 | 0.4037476 | 0.3916815 |
| 0.3387138 | 0.3778314 | 0.5327112 |
| 0.5365975 | 0.3999414 | 0.3962618 |
| 0.6556707 | 0.4012982 | 0.3943719 |
| 0.7835285 | 0.3966019 | 0.5518759 |
| 0.8865718 | 0.4034359 | 0.3913204 |
| 0.2768671 | 0.8938650 | 0.5518733 |
| 0.1655177 | 0.8935643 | 0.5536088 |
| 0.0661844 | 0.9000427 | 0.3895830 |
| 0.1802293 | 0.8983055 | 0.3900432 |
| 0.6095958 | 0.8994819 | 0.5457144 |
| 0.4973110 | 0.9019635 | 0.5458678 |
| 0.3979754 | 0.9026670 | 0.3897487 |
| 0.5075511 | 0.9071453 | 0.3888504 |
| 0.9427212 | 0.8945674 | 0.5525111 |
| 0.8313445 | 0.8967085 | 0.5502344 |

|           |           |           |
|-----------|-----------|-----------|
| 0.7268930 | 0.9020179 | 0.3881320 |
| 0.8389609 | 0.9022178 | 0.3884142 |
| 0.9999797 | 0.7942569 | 0.5519677 |
| 0.0057835 | 0.8013053 | 0.3887530 |
| 0.2809115 | 0.6901363 | 0.5435565 |
| 0.1687332 | 0.6924858 | 0.5480860 |
| 0.0603146 | 0.7013745 | 0.3886167 |
| 0.1753807 | 0.7003893 | 0.3886194 |
| 0.1116078 | 0.7929162 | 0.5516672 |
| 0.2417495 | 0.7960959 | 0.3892093 |
| 0.3344045 | 0.7938983 | 0.5469676 |
| 0.3577527 | 0.7956028 | 0.3895775 |
| 0.4407267 | 0.8070457 | 0.5453685 |
| 0.4815216 | 0.7178484 | 0.3898955 |
| 0.4932604 | 0.5036488 | 0.3939883 |
| 0.5546630 | 0.8043507 | 0.3883608 |
| 0.6681616 | 0.8056398 | 0.5467900 |
| 0.6670829 | 0.8027071 | 0.3881174 |
| 0.9456902 | 0.6941876 | 0.5512110 |
| 0.8325057 | 0.6951606 | 0.5504672 |
| 0.7191055 | 0.7019307 | 0.3888729 |
| 0.8327935 | 0.7020471 | 0.3886935 |
| 0.7753937 | 0.7967061 | 0.5490764 |
| 0.8928078 | 0.8011413 | 0.3883519 |
| 0.0024413 | 0.5941108 | 0.5509947 |
| 0.0006728 | 0.6023514 | 0.3890715 |
| 0.1154115 | 0.5917396 | 0.5483188 |
| 0.2197484 | 0.5999482 | 0.3891099 |
| 0.3299066 | 0.5899923 | 0.5352174 |
| 0.5353666 | 0.6095243 | 0.3913510 |
| 0.6553342 | 0.6055669 | 0.3907243 |
| 0.7838006 | 0.5964976 | 0.5507131 |
| 0.8869251 | 0.6018118 | 0.3893975 |
| 0.9973128 | 0.9942439 | 0.5548087 |
| 0.0102900 | 0.0020778 | 0.3902354 |
| 0.1083519 | 0.9929518 | 0.5561557 |
| 0.2313697 | 0.0021448 | 0.3914686 |
| 0.3308188 | 0.9946795 | 0.5519656 |
| 0.3411702 | 0.0025478 | 0.3912381 |
| 0.4412688 | 0.0033780 | 0.5470895 |
| 0.5634727 | 0.0032331 | 0.3903515 |
| 0.6640012 | 0.0001508 | 0.5459544 |
| 0.6739265 | 0.0029574 | 0.3897433 |
| 0.7751250 | 0.9973637 | 0.5490925 |

|           |           |           |
|-----------|-----------|-----------|
| 0.8964337 | 0.0024294 | 0.3894951 |
| 0.1719916 | 0.4907077 | 0.5455989 |
| 0.0546707 | 0.5021979 | 0.3897631 |
| 0.1683131 | 0.5019823 | 0.3896951 |
| 0.2876283 | 0.4857888 | 0.5363180 |
| 0.9462054 | 0.4955896 | 0.5520826 |
| 0.8326870 | 0.4964103 | 0.5518722 |
| 0.7110877 | 0.5032353 | 0.3918531 |
| 0.8274908 | 0.5027775 | 0.3907192 |

(7) The structure of intermediate between V5+V9 and V3+V11

106

Direct

|           |           |           |
|-----------|-----------|-----------|
| 0.2662498 | 0.0975681 | 0.5608946 |
| 0.1561460 | 0.0969202 | 0.5658786 |
| 0.0679633 | 0.0974957 | 0.3872156 |
| 0.1793009 | 0.0963492 | 0.3918475 |
| 0.5992724 | 0.1047450 | 0.5353826 |
| 0.4851461 | 0.1084800 | 0.5319469 |
| 0.3996379 | 0.1013168 | 0.3946360 |
| 0.5106853 | 0.1050159 | 0.3931024 |
| 0.9348480 | 0.0981156 | 0.5595358 |
| 0.8244091 | 0.0993534 | 0.5518449 |
| 0.7332260 | 0.1035834 | 0.3848661 |
| 0.8449778 | 0.1005255 | 0.3843120 |
| 0.9898746 | 0.1980899 | 0.5629275 |
| 0.0106692 | 0.1984421 | 0.3863671 |
| 0.2585373 | 0.2913648 | 0.5319469 |
| 0.1548090 | 0.2956417 | 0.5526932 |
| 0.0648793 | 0.2983137 | 0.3901032 |
| 0.1746158 | 0.2963009 | 0.4049531 |
| 0.1005748 | 0.1970124 | 0.5644572 |
| 0.2335456 | 0.1960211 | 0.4044055 |
| 0.3161201 | 0.1965170 | 0.5429119 |
| 0.3434824 | 0.1964455 | 0.4130172 |
| 0.4073079 | 0.2816518 | 0.4555920 |
| 0.5103027 | 0.3027377 | 0.4203198 |
| 0.4189686 | 0.2002446 | 0.5174307 |
| 0.5642662 | 0.2063448 | 0.3996472 |
| 0.6612274 | 0.1951028 | 0.5401377 |
| 0.6755379 | 0.2044480 | 0.3901345 |
| 0.9359476 | 0.2986800 | 0.5585396 |
| 0.8242708 | 0.3002136 | 0.5533991 |
| 0.7298620 | 0.3041019 | 0.3917884 |

|            |           |           |
|------------|-----------|-----------|
| 0.8416624  | 0.3014584 | 0.3879068 |
| 0.7681196  | 0.1995835 | 0.5490351 |
| 0.8991164  | 0.2008421 | 0.3855243 |
| -0.0077324 | 0.3986337 | 0.5561803 |
| 0.0078942  | 0.3985681 | 0.3894309 |
| 0.1026418  | 0.3973053 | 0.5512216 |
| 0.2238957  | 0.3913748 | 0.4263674 |
| 0.3021649  | 0.3779984 | 0.4848991 |
| 0.5601339  | 0.4054881 | 0.4106417 |
| 0.6723089  | 0.4042219 | 0.3971675 |
| 0.7760177  | 0.3996290 | 0.5504854 |
| 0.8957287  | 0.4016077 | 0.3881362 |
| 0.2700317  | 0.8973317 | 0.5567441 |
| 0.1587535  | 0.8968220 | 0.5595988 |
| 0.0727120  | 0.8947015 | 0.3861852 |
| 0.1871696  | 0.8914848 | 0.3873792 |
| 0.6026765  | 0.9024540 | 0.5407775 |
| 0.4899919  | 0.9044472 | 0.5440203 |
| 0.4044761  | 0.9008893 | 0.3856506 |
| 0.5136396  | 0.9089670 | 0.3836480 |
| 0.9360263  | 0.8980353 | 0.5546368 |
| 0.8246207  | 0.9001046 | 0.5491171 |
| 0.7322235  | 0.9021383 | 0.3830310 |
| 0.8445621  | 0.8999401 | 0.3834031 |
| -0.0069352 | 0.7976033 | 0.5542585 |
| 0.0134706  | 0.7967033 | 0.3857643 |
| 0.2734252  | 0.6936955 | 0.5453311 |
| 0.1618475  | 0.6958000 | 0.5507719 |
| 0.0696721  | 0.6967044 | 0.3880075 |
| 0.1845225  | 0.6928737 | 0.3918278 |
| 0.1046288  | 0.7963265 | 0.5556076 |
| 0.2506095  | 0.7891963 | 0.3888510 |
| 0.3269573  | 0.7966319 | 0.5494643 |
| 0.3674456  | 0.7916039 | 0.3889514 |
| 0.4336144  | 0.8097613 | 0.5447738 |
| 0.4880264  | 0.7196115 | 0.3909778 |
| 0.5089147  | 0.5071756 | 0.4100271 |
| 0.5614834  | 0.8058699 | 0.3852992 |
| 0.6615922  | 0.8090830 | 0.5421080 |
| 0.6738813  | 0.8028586 | 0.3846987 |
| 0.9384514  | 0.6976487 | 0.5518517 |
| 0.8256733  | 0.6985337 | 0.5486040 |
| 0.7278683  | 0.7023987 | 0.3867149 |
| 0.8417068  | 0.7004114 | 0.3853669 |

|            |            |           |
|------------|------------|-----------|
| 0.7688578  | 0.8001401  | 0.5459996 |
| 0.9002293  | 0.7989998  | 0.3843899 |
| -0.0051591 | 0.5972932  | 0.5528494 |
| 0.0113968  | 0.5978982  | 0.3876713 |
| 0.1075995  | 0.5950459  | 0.5504760 |
| 0.2267234  | 0.5914527  | 0.4025056 |
| 0.3200933  | 0.5916555  | 0.5303222 |
| 0.5454477  | 0.6115114  | 0.3971152 |
| 0.6658028  | 0.6066575  | 0.3916411 |
| 0.7766631  | 0.5998109  | 0.5482742 |
| 0.8977458  | 0.6002872  | 0.3863302 |
| 0.9907507  | 0.9976082  | 0.5600278 |
| 0.0146586  | 0.9962843  | 0.3851891 |
| 0.1018649  | 0.9964629  | 0.5636168 |
| 0.2359583  | 0.9957199  | 0.3888062 |
| 0.3237655  | -0.0008700 | 0.5557726 |
| 0.3461560  | 0.9994228  | 0.3876433 |
| 0.4337754  | 0.0059388  | 0.5460371 |
| 0.5674288  | 0.0071257  | 0.3849853 |
| 0.6569847  | 0.0032454  | 0.5404172 |
| 0.6787930  | 0.0040409  | 0.3836721 |
| 0.7681481  | 0.0006089  | 0.5466862 |
| 0.9015197  | 0.9990435  | 0.3837853 |
| 0.1628473  | 0.4940842  | 0.5444406 |
| 0.0651294  | 0.4964539  | 0.3916887 |
| 0.1765483  | 0.4923543  | 0.4058070 |
| 0.2755133  | 0.4913858  | 0.5251811 |
| 0.9384476  | 0.4988419  | 0.5537529 |
| 0.8250305  | 0.4995567  | 0.5513607 |
| 0.7244352  | 0.5055448  | 0.3918084 |
| 0.8386992  | 0.5026198  | 0.3881839 |

(8) The structure of TS between intermediate and V3+V11

106

Direct

|           |           |           |
|-----------|-----------|-----------|
| 0.2752176 | 0.1035961 | 0.5516647 |
| 0.1643717 | 0.1015475 | 0.5527661 |
| 0.0607996 | 0.0950983 | 0.3874475 |
| 0.1719632 | 0.0938188 | 0.3891893 |
| 0.6082651 | 0.1006010 | 0.5481840 |
| 0.4961611 | 0.1019128 | 0.5476829 |
| 0.3939891 | 0.0975211 | 0.3902384 |
| 0.5046301 | 0.1019812 | 0.3903295 |
| 0.9422074 | 0.1006501 | 0.5529202 |

|           |           |           |
|-----------|-----------|-----------|
| 0.8309575 | 0.1003248 | 0.5512440 |
| 0.7273585 | 0.1006943 | 0.3879432 |
| 0.8388130 | 0.0980477 | 0.3873812 |
| 0.9975492 | 0.2008198 | 0.5527988 |
| 0.0037282 | 0.1959396 | 0.3875882 |
| 0.2738740 | 0.3059163 | 0.5392074 |
| 0.1649812 | 0.3014078 | 0.5475113 |
| 0.0575303 | 0.2961162 | 0.3896573 |
| 0.1681991 | 0.2937859 | 0.3957767 |
| 0.1089712 | 0.2011994 | 0.5518192 |
| 0.2254076 | 0.1938755 | 0.3947715 |
| 0.3311454 | 0.2073749 | 0.5468093 |
| 0.3366155 | 0.1952876 | 0.3976007 |
| 0.3902303 | 0.2943393 | 0.4123102 |
| 0.5005315 | 0.3006786 | 0.4042034 |
| 0.4393521 | 0.1964454 | 0.5457040 |
| 0.5580927 | 0.2024261 | 0.3944024 |
| 0.6664146 | 0.1938955 | 0.5491598 |
| 0.6698982 | 0.2011879 | 0.3913803 |
| 0.9414321 | 0.3001028 | 0.5517997 |
| 0.8295006 | 0.3010197 | 0.5513109 |
| 0.7240232 | 0.3013540 | 0.3929261 |
| 0.8354539 | 0.2991372 | 0.3899590 |
| 0.7739156 | 0.2000454 | 0.5507893 |
| 0.8924884 | 0.1984452 | 0.3880330 |
| 0.9965830 | 0.4001050 | 0.5516532 |
| 0.0012644 | 0.3968715 | 0.3904879 |
| 0.1068045 | 0.3996816 | 0.5504632 |
| 0.2223803 | 0.3911748 | 0.4099797 |
| 0.3233880 | 0.3776018 | 0.4364422 |
| 0.5544058 | 0.4038221 | 0.4011070 |
| 0.6668883 | 0.4021576 | 0.3960641 |
| 0.7806804 | 0.4002511 | 0.5506074 |
| 0.8895849 | 0.3995544 | 0.3898475 |
| 0.2747895 | 0.9011492 | 0.5532974 |
| 0.1640099 | 0.9004525 | 0.5541871 |
| 0.0663353 | 0.8928957 | 0.3873632 |
| 0.1808331 | 0.8897949 | 0.3878379 |
| 0.6088761 | 0.9001576 | 0.5468329 |
| 0.4962036 | 0.9003657 | 0.5476762 |
| 0.3984862 | 0.8977713 | 0.3868839 |
| 0.5079858 | 0.9059376 | 0.3860254 |
| 0.9428275 | 0.9003967 | 0.5525581 |
| 0.8316024 | 0.9007275 | 0.5504705 |



|           |           |           |
|-----------|-----------|-----------|
| 0.7267227 | 0.8996208 | 0.3860037 |
| 0.8387450 | 0.8976459 | 0.3861239 |
| 0.9982608 | 0.8000240 | 0.5530518 |
| 0.0074373 | 0.7951188 | 0.3874436 |
| 0.2773720 | 0.6976565 | 0.5520027 |
| 0.1654213 | 0.6989353 | 0.5537100 |
| 0.0634550 | 0.6951972 | 0.3895395 |
| 0.1780626 | 0.6919976 | 0.3924688 |
| 0.1094663 | 0.7997626 | 0.5541028 |
| 0.2441412 | 0.7878735 | 0.3894262 |
| 0.3307890 | 0.7998212 | 0.5517239 |
| 0.3604895 | 0.7896457 | 0.3891540 |
| 0.4382704 | 0.8071862 | 0.5489111 |
| 0.4844712 | 0.7163330 | 0.3906255 |
| 0.5038667 | 0.5042762 | 0.3982029 |
| 0.5564347 | 0.8032771 | 0.3873930 |
| 0.6678148 | 0.8076193 | 0.5465701 |
| 0.6687776 | 0.8006443 | 0.3870451 |
| 0.9427137 | 0.7001584 | 0.5522017 |
| 0.8305370 | 0.6997107 | 0.5503944 |
| 0.7228582 | 0.7005599 | 0.3884754 |
| 0.8360895 | 0.6986352 | 0.3874797 |
| 0.7751172 | 0.8010409 | 0.5489634 |
| 0.8944797 | 0.7971224 | 0.3865906 |
| 0.9977503 | 0.5999775 | 0.5526283 |
| 0.0048091 | 0.5966883 | 0.3897266 |
| 0.1092162 | 0.5994457 | 0.5533405 |
| 0.2206795 | 0.5906709 | 0.4008160 |
| 0.3241312 | 0.5932214 | 0.5486457 |
| 0.5416275 | 0.6096613 | 0.3936655 |
| 0.6610904 | 0.6046389 | 0.3917985 |
| 0.7810407 | 0.6009831 | 0.5498570 |
| 0.8917282 | 0.5986522 | 0.3884095 |
| 0.9978207 | 1.0006083 | 0.5534337 |
| 0.0079816 | 0.9939753 | 0.3867464 |
| 0.1090282 | 1.0008908 | 0.5539045 |
| 0.2297742 | 0.9933422 | 0.3879339 |
| 0.3300397 | 0.0022056 | 0.5517708 |
| 0.3400482 | 0.9959719 | 0.3873956 |
| 0.4403988 | 0.0012216 | 0.5490385 |
| 0.5621025 | 0.0034401 | 0.3868407 |
| 0.6646795 | 0.0004986 | 0.5480860 |
| 0.6730431 | 0.0011007 | 0.3866557 |
| 0.7754960 | 0.0004265 | 0.5497605 |

|           |           |           |
|-----------|-----------|-----------|
| 0.8954006 | 0.9967400 | 0.3864562 |
| 0.1629761 | 0.4977953 | 0.5524768 |
| 0.0579454 | 0.4954430 | 0.3928966 |
| 0.1695247 | 0.4924508 | 0.4021591 |
| 0.2724534 | 0.5037807 | 0.5519728 |
| 0.9426002 | 0.5005033 | 0.5520517 |
| 0.8292416 | 0.5006101 | 0.5510429 |
| 0.7193808 | 0.5035244 | 0.3924401 |
| 0.8331661 | 0.5007231 | 0.3899511 |

(9) The structure of V3+V11

106

Direct

|           |           |           |
|-----------|-----------|-----------|
| 0.2791694 | 0.1074780 | 0.5517476 |
| 0.1687053 | 0.1013187 | 0.5516093 |
| 0.0595356 | 0.0995944 | 0.3892232 |
| 0.1703752 | 0.0996211 | 0.3894341 |
| 0.6111002 | 0.1009390 | 0.5505309 |
| 0.4977951 | 0.1045507 | 0.5507933 |
| 0.3924135 | 0.0994544 | 0.3898603 |
| 0.5028932 | 0.0993691 | 0.3899797 |
| 0.9466560 | 0.0982456 | 0.5511166 |
| 0.8354627 | 0.0981354 | 0.5508269 |
| 0.7268894 | 0.0994158 | 0.3894846 |
| 0.8380810 | 0.0994831 | 0.3892857 |
| 0.0006477 | 0.1990999 | 0.5513229 |
| 0.0050521 | 0.2017304 | 0.3895245 |
| 0.2739450 | 0.3223767 | 0.5519736 |
| 0.1654264 | 0.3024465 | 0.5519140 |
| 0.0615907 | 0.3027023 | 0.3899107 |
| 0.1762034 | 0.3041057 | 0.3902707 |
| 0.1122217 | 0.2004634 | 0.5516207 |
| 0.2264908 | 0.2009161 | 0.3900079 |
| 0.3340624 | 0.2182247 | 0.5517511 |
| 0.3370606 | 0.2003780 | 0.3904698 |
| 0.3939506 | 0.2997135 | 0.3915603 |
| 0.5036065 | 0.2952127 | 0.3922159 |
| 0.4416297 | 0.2005814 | 0.5511779 |
| 0.5592320 | 0.1981500 | 0.3909867 |
| 0.6711481 | 0.1920120 | 0.5502319 |
| 0.6703472 | 0.1992425 | 0.3905693 |
| 0.9426852 | 0.2975489 | 0.5513335 |
| 0.8315822 | 0.2989954 | 0.5509975 |
| 0.7215519 | 0.3011544 | 0.3909805 |

|            |           |           |
|------------|-----------|-----------|
| 0.8339359  | 0.3008462 | 0.3900782 |
| 0.7780890  | 0.1975611 | 0.5507181 |
| 0.8924653  | 0.2013588 | 0.3895640 |
| -0.0045229 | 0.3981339 | 0.5515545 |
| 0.0012338  | 0.4010267 | 0.3899446 |
| 0.1038750  | 0.3975294 | 0.5518311 |
| 0.2383978  | 0.4055349 | 0.3909329 |
| 0.3544836  | 0.4076940 | 0.3916681 |
| 0.5488298  | 0.3998161 | 0.3925125 |
| 0.6610535  | 0.4010299 | 0.3919192 |
| 0.7819630  | 0.3981945 | 0.5505725 |
| 0.8879560  | 0.4016984 | 0.3900140 |
| 0.2801402  | 0.8968647 | 0.5516580 |
| 0.1692927  | 0.8970411 | 0.5516095 |
| 0.0614124  | 0.8965159 | 0.3890532 |
| 0.1760469  | 0.8951649 | 0.3891841 |
| 0.6120247  | 0.8998017 | 0.5501270 |
| 0.4989745  | 0.9006834 | 0.5503914 |
| 0.3937893  | 0.8991595 | 0.3893738 |
| 0.5034610  | 0.9034709 | 0.3893784 |
| 0.9477091  | 0.8980305 | 0.5510297 |
| 0.8359165  | 0.8991984 | 0.5506151 |
| 0.7214102  | 0.8977368 | 0.3890954 |
| 0.8337847  | 0.8981366 | 0.3890303 |
| 0.0032343  | 0.7970967 | 0.5512583 |
| 0.0010799  | 0.7981534 | 0.3891957 |
| 0.2823825  | 0.6833762 | 0.5515649 |
| 0.1703246  | 0.6927104 | 0.5518651 |
| 0.0577738  | 0.6992445 | 0.3895667 |
| 0.1719313  | 0.6991859 | 0.3899214 |
| 0.1149377  | 0.7954707 | 0.5516220 |
| 0.2381575  | 0.7937444 | 0.3895610 |
| 0.3361044  | 0.7912454 | 0.5513352 |
| 0.3541275  | 0.7912829 | 0.3898061 |
| 0.4428203  | 0.8054425 | 0.5506905 |
| 0.4717053  | 0.7124357 | 0.3906638 |
| 0.4718842  | 0.4862151 | 0.3921073 |
| 0.5486406  | 0.7989559 | 0.3898614 |
| 0.6714565  | 0.8074198 | 0.5496406 |
| 0.6608819  | 0.7978156 | 0.3896659 |
| 0.9462404  | 0.6977332 | 0.5511890 |
| 0.8338880  | 0.6982218 | 0.5506719 |
| 0.7124292  | 0.6963883 | 0.3900919 |
| 0.8281158  | 0.6976466 | 0.3895711 |

|           |            |           |
|-----------|------------|-----------|
| 0.7788499 | 0.7998886  | 0.5502957 |
| 0.8878302 | 0.7973519  | 0.3891597 |
| 0.0002389 | 0.5969112  | 0.5515312 |
| 0.0009830 | 0.5995319  | 0.3897763 |
| 0.1123108 | 0.5944842  | 0.5519109 |
| 0.2180879 | 0.5996922  | 0.3909534 |
| 0.3251454 | 0.5723784  | 0.5513284 |
| 0.5185452 | 0.5993084  | 0.3914244 |
| 0.6476139 | 0.5994108  | 0.3910894 |
| 0.7828423 | 0.6001565  | 0.5504955 |
| 0.8865053 | 0.5994934  | 0.3897279 |
| 0.0031510 | -0.0017492 | 0.5512033 |
| 0.0050071 | 0.9974425  | 0.3889835 |
| 0.1145133 | -0.0014265 | 0.5514671 |
| 0.2264130 | 0.9982750  | 0.3892558 |
| 0.3335274 | 0.0025165  | 0.5515129 |
| 0.3369815 | 0.9985648  | 0.3893533 |
| 0.4438747 | 0.0022790  | 0.5509882 |
| 0.5591358 | 0.0005807  | 0.3893567 |
| 0.6677183 | 0.0000599  | 0.5504419 |
| 0.6702786 | -0.0004521 | 0.3892214 |
| 0.7791701 | -0.0010987 | 0.5505932 |
| 0.8923893 | 0.9977170  | 0.3889859 |
| 0.1635197 | 0.4923585  | 0.5520413 |
| 0.0579080 | 0.4999319  | 0.3901225 |
| 0.1721330 | 0.5000595  | 0.3907526 |
| 0.2739938 | 0.4710918  | 0.5519638 |
| 0.9428449 | 0.4988301  | 0.5513861 |
| 0.8297372 | 0.4991876  | 0.5509011 |
| 0.7124693 | 0.5025203  | 0.3910823 |
| 0.8281988 | 0.5013617  | 0.3901703 |

(10) The structure of TS between V3+V11 and V2+V12

106

Direct

|           |           |           |
|-----------|-----------|-----------|
| 0.2779320 | 0.0968971 | 0.5495512 |
| 0.1676834 | 0.1011364 | 0.5500100 |
| 0.0597487 | 0.0983150 | 0.3881560 |
| 0.1708260 | 0.0983436 | 0.3885413 |
| 0.6119149 | 0.0995608 | 0.5505979 |
| 0.4988761 | 0.0972866 | 0.5501809 |
| 0.3924739 | 0.0994652 | 0.3912734 |

|           |           |           |
|-----------|-----------|-----------|
| 0.5031260 | 0.0998730 | 0.3913862 |
| 0.9463742 | 0.1018400 | 0.5511312 |
| 0.8349029 | 0.1003507 | 0.5508701 |
| 0.7269587 | 0.0994419 | 0.3897237 |
| 0.8383138 | 0.0987890 | 0.3892335 |
| 0.0031676 | 0.2021837 | 0.5509182 |
| 0.0047103 | 0.2002166 | 0.3878479 |
| 0.2799871 | 0.2984994 | 0.5433700 |
| 0.1724096 | 0.3045488 | 0.5476803 |
| 0.0606571 | 0.3011779 | 0.3869739 |
| 0.1748208 | 0.3022278 | 0.3872850 |
| 0.1143830 | 0.2030526 | 0.5497718 |
| 0.2262616 | 0.1993476 | 0.3892665 |
| 0.3341593 | 0.1998413 | 0.5471553 |
| 0.3366792 | 0.2000901 | 0.3927765 |
| 0.3930655 | 0.2999605 | 0.3965254 |
| 0.5026879 | 0.2962470 | 0.3951645 |
| 0.4419689 | 0.1906847 | 0.5481171 |
| 0.5589864 | 0.1987575 | 0.3927558 |
| 0.6713833 | 0.1922959 | 0.5505222 |
| 0.6701330 | 0.1994332 | 0.3911448 |
| 0.9491717 | 0.3027648 | 0.5514247 |
| 0.8361240 | 0.3015118 | 0.5511725 |
| 0.7218717 | 0.3010574 | 0.3910616 |
| 0.8340102 | 0.3002266 | 0.3892676 |
| 0.7791058 | 0.2002361 | 0.5508427 |
| 0.8924256 | 0.2003717 | 0.3887762 |
| 0.0054979 | 0.4039785 | 0.5521107 |
| 0.0009548 | 0.3997936 | 0.3872106 |
| 0.1192059 | 0.4083819 | 0.5501608 |
| 0.2343524 | 0.4029993 | 0.3883688 |
| 0.3510886 | 0.4075424 | 0.3962948 |
| 0.5497038 | 0.4005774 | 0.3927403 |
| 0.6620411 | 0.4010966 | 0.3916284 |
| 0.7850388 | 0.3992159 | 0.5506956 |
| 0.8878537 | 0.4009220 | 0.3881804 |
| 0.2766245 | 0.8926831 | 0.5495393 |
| 0.1658727 | 0.8997200 | 0.5517539 |
| 0.0627557 | 0.8949849 | 0.3897937 |
| 0.1771685 | 0.8932546 | 0.3901386 |
| 0.6099186 | 0.8978263 | 0.5487558 |
| 0.4965370 | 0.8938158 | 0.5478924 |
| 0.3947727 | 0.8988788 | 0.3891469 |
| 0.5044208 | 0.9037865 | 0.3889281 |

|           |           |           |
|-----------|-----------|-----------|
| 0.9437539 | 0.9018663 | 0.5520578 |
| 0.8330695 | 0.9011738 | 0.5507749 |
| 0.7227990 | 0.8977560 | 0.3889078 |
| 0.8351650 | 0.8974526 | 0.3890706 |
| 0.9972946 | 0.8018146 | 0.5542542 |
| 0.0033008 | 0.7964630 | 0.3899603 |
| 0.2675247 | 0.6866408 | 0.5464563 |
| 0.1601951 | 0.7027708 | 0.5547950 |
| 0.0601938 | 0.6971341 | 0.3914850 |
| 0.1749804 | 0.6952906 | 0.3959570 |
| 0.1077552 | 0.8024928 | 0.5547663 |
| 0.2396656 | 0.7914081 | 0.3923967 |
| 0.3304658 | 0.7860466 | 0.5460721 |
| 0.3554692 | 0.7911294 | 0.3903090 |
| 0.4388348 | 0.7986325 | 0.5448270 |
| 0.4746448 | 0.7128900 | 0.3903994 |
| 0.4765460 | 0.4885103 | 0.3905930 |
| 0.5503411 | 0.7996469 | 0.3893872 |
| 0.6696278 | 0.8065159 | 0.5485712 |
| 0.6626411 | 0.7981891 | 0.3892800 |
| 0.9418000 | 0.7017697 | 0.5542541 |
| 0.8307199 | 0.6998905 | 0.5514885 |
| 0.7140703 | 0.6967988 | 0.3896792 |
| 0.8295314 | 0.6974577 | 0.3895490 |
| 0.7765758 | 0.8011921 | 0.5501791 |
| 0.8895345 | 0.7965581 | 0.3893698 |
| 0.9958704 | 0.6017323 | 0.5556435 |
| 0.0015898 | 0.5985362 | 0.3901972 |
| 0.1047056 | 0.6037109 | 0.5565973 |
| 0.2218541 | 0.5948620 | 0.4015693 |
| 0.2757908 | 0.5632722 | 0.5372958 |
| 0.5224782 | 0.6007571 | 0.3905250 |
| 0.6492430 | 0.5999688 | 0.3903579 |
| 0.7827949 | 0.5999743 | 0.5506129 |
| 0.8873973 | 0.5989883 | 0.3894068 |
| 0.0007043 | 0.0013101 | 0.5515531 |
| 0.0058321 | 0.9962905 | 0.3889055 |
| 0.1117449 | 0.0009499 | 0.5513002 |
| 0.2271134 | 0.9968461 | 0.3892727 |
| 0.3321950 | 0.9945826 | 0.5497741 |
| 0.3375060 | 0.9982058 | 0.3896432 |
| 0.4428533 | 0.9954137 | 0.5497467 |
| 0.5597685 | 0.0009953 | 0.3896216 |
| 0.6665756 | 0.9989404 | 0.5500779 |

|           |           |           |
|-----------|-----------|-----------|
| 0.6709043 | 0.9996799 | 0.3893203 |
| 0.7777304 | 0.0005024 | 0.5505016 |
| 0.8932236 | 0.9971128 | 0.3890134 |
| 0.1700318 | 0.5127180 | 0.5522928 |
| 0.0574969 | 0.4986931 | 0.3886422 |
| 0.1707504 | 0.4981488 | 0.3909364 |
| 0.3291396 | 0.5157267 | 0.4864286 |
| 0.9453395 | 0.5007764 | 0.5533283 |
| 0.8319909 | 0.5000045 | 0.5515357 |
| 0.7133622 | 0.5025423 | 0.3901638 |
| 0.8288214 | 0.5009931 | 0.3889644 |

(11) The structure of V2+V12

106

Direct

|            |           |           |
|------------|-----------|-----------|
| 0.2779674  | 0.0950489 | 0.5512875 |
| 0.1678965  | 0.1004519 | 0.5513142 |
| 0.0571952  | 0.0945262 | 0.3889561 |
| 0.1684772  | 0.0926227 | 0.3891329 |
| 0.6123638  | 0.0993384 | 0.5505362 |
| 0.4997106  | 0.0969423 | 0.5507061 |
| 0.3904835  | 0.1006287 | 0.3895637 |
| 0.5013845  | 0.1059863 | 0.3896934 |
| 0.9465277  | 0.1013987 | 0.5512268 |
| 0.8350582  | 0.1001844 | 0.5509826 |
| 0.7243703  | 0.1034042 | 0.3896017 |
| 0.8354794  | 0.0991117 | 0.3893689 |
| 0.0034194  | 0.2021924 | 0.5513280 |
| -0.0016457 | 0.1958062 | 0.3891265 |
| 0.2787941  | 0.2933761 | 0.5513354 |
| 0.1722506  | 0.3045999 | 0.5514402 |
| 0.0516358  | 0.2954789 | 0.3895454 |
| 0.1624987  | 0.2917948 | 0.3903637 |
| 0.1142965  | 0.2024595 | 0.5514077 |
| 0.2212905  | 0.1934070 | 0.3900014 |
| 0.3349908  | 0.1973615 | 0.5513119 |
| 0.3321530  | 0.1987886 | 0.3906359 |
| 0.3848584  | 0.3010552 | 0.3925318 |
| 0.4950914  | 0.3067884 | 0.3927525 |
| 0.4426681  | 0.1901861 | 0.5509801 |
| 0.5542108  | 0.2066690 | 0.3911108 |
| 0.6720619  | 0.1923798 | 0.5503160 |

|            |           |           |
|------------|-----------|-----------|
| 0.6655476  | 0.2046929 | 0.3907512 |
| 0.9500212  | 0.3029860 | 0.5513675 |
| 0.8367940  | 0.3017837 | 0.5511719 |
| 0.7167309  | 0.3062756 | 0.3910891 |
| 0.8293452  | 0.3019998 | 0.3899339 |
| 0.7794862  | 0.2002836 | 0.5509115 |
| 0.8872742  | 0.2000812 | 0.3893966 |
| 0.0064495  | 0.4043629 | 0.5512924 |
| -0.0029630 | 0.3973222 | 0.3897559 |
| 0.1206606  | 0.4092582 | 0.5512031 |
| 0.2158768  | 0.3891819 | 0.3918959 |
| 0.3251936  | 0.3983053 | 0.3934099 |
| 0.5419637  | 0.4119416 | 0.3931753 |
| 0.6564551  | 0.4082227 | 0.3921280 |
| 0.7854005  | 0.3990085 | 0.5508811 |
| 0.8846346  | 0.4014136 | 0.3897601 |
| 0.2769252  | 0.8917799 | 0.5511771 |
| 0.1660746  | 0.8995326 | 0.5511915 |
| 0.0662647  | 0.8909808 | 0.3892635 |
| 0.1806689  | 0.8873114 | 0.3893109 |
| 0.6099759  | 0.8978770 | 0.5501561 |
| 0.4971949  | 0.8941785 | 0.5502952 |
| 0.3973118  | 0.9010227 | 0.3888990 |
| 0.5066236  | 0.9102508 | 0.3886877 |
| 0.9435111  | 0.9016418 | 0.5509960 |
| 0.8330876  | 0.9011134 | 0.5506708 |
| 0.7256081  | 0.9019179 | 0.3888758 |
| 0.8380129  | 0.8978135 | 0.3890285 |
| 0.9968558  | 0.8013066 | 0.5509374 |
| 0.0098933  | 0.7917379 | 0.3895910 |
| 0.2700018  | 0.6835095 | 0.5508020 |
| 0.1592625  | 0.7026684 | 0.5508261 |
| 0.0690511  | 0.6907765 | 0.3901588 |
| 0.1890579  | 0.6828721 | 0.3909056 |
| 0.1076666  | 0.8014977 | 0.5510524 |
| 0.2469913  | 0.7847827 | 0.3899774 |
| 0.3317230  | 0.7852244 | 0.5508823 |
| 0.3623562  | 0.7919685 | 0.3898016 |
| 0.4389597  | 0.7985997 | 0.5502664 |
| 0.4816654  | 0.7223404 | 0.3906898 |
| 0.4756396  | 0.5144673 | 0.3931794 |
| 0.5552330  | 0.8082698 | 0.3894159 |
| 0.6696132  | 0.8063886 | 0.5496273 |
| 0.6667674  | 0.8037616 | 0.3893340 |



|           |           |           |
|-----------|-----------|-----------|
| 0.9413955 | 0.7016834 | 0.5508750 |
| 0.8301799 | 0.6995253 | 0.5504983 |
| 0.7187956 | 0.7027114 | 0.3899360 |
| 0.8334631 | 0.6995099 | 0.3895650 |
| 0.7763495 | 0.8009634 | 0.5502453 |
| 0.8947015 | 0.7962386 | 0.3892935 |
| 0.9960035 | 0.6019056 | 0.5510828 |
| 0.0036297 | 0.5965298 | 0.3899553 |
| 0.1043478 | 0.6045580 | 0.5509072 |
| 0.2407353 | 0.5771102 | 0.3921622 |
| 0.2755469 | 0.5673070 | 0.5501334 |
| 0.5334656 | 0.6163035 | 0.3918369 |
| 0.6534311 | 0.6084132 | 0.3911469 |
| 0.7823189 | 0.5996988 | 0.5503739 |
| 0.8890829 | 0.5996941 | 0.3897243 |
| 0.0005610 | 0.0011120 | 0.5511736 |
| 0.0060945 | 0.9928489 | 0.3889884 |
| 0.1119850 | 0.0001321 | 0.5512312 |
| 0.2275187 | 0.9924869 | 0.3889985 |
| 0.3326030 | 0.9933933 | 0.5510712 |
| 0.3377001 | 0.9982982 | 0.3889217 |
| 0.4434162 | 0.9950631 | 0.5507305 |
| 0.5600915 | 0.0075249 | 0.3888699 |
| 0.6668877 | 0.9989793 | 0.5505346 |
| 0.6711140 | 0.0037868 | 0.3890131 |
| 0.7778787 | 0.0004697 | 0.5507057 |
| 0.8933689 | 0.9971697 | 0.3890388 |
| 0.1729679 | 0.5138163 | 0.5508611 |
| 0.0557596 | 0.4954532 | 0.3902730 |
| 0.1671640 | 0.4909724 | 0.3914534 |
| 0.3601068 | 0.5073995 | 0.3936453 |
| 0.9454775 | 0.5007746 | 0.5511547 |
| 0.8321974 | 0.4999863 | 0.5509090 |
| 0.7127297 | 0.5073400 | 0.3911365 |
| 0.8279038 | 0.5028777 | 0.3900637 |

(12) The structure of the TS between V2+V12 and intermediate

106

Direct

|           |           |           |
|-----------|-----------|-----------|
| 0.2840076 | 0.0841800 | 0.5553894 |
| 0.1738569 | 0.0897216 | 0.5546815 |
| 0.0517389 | 0.1047312 | 0.3868314 |
| 0.1630093 | 0.1030812 | 0.3878794 |

|           |           |           |
|-----------|-----------|-----------|
| 0.6186808 | 0.0881276 | 0.5524869 |
| 0.5059130 | 0.0861843 | 0.5540635 |
| 0.3849310 | 0.1097109 | 0.3903190 |
| 0.4958338 | 0.1141203 | 0.3907670 |
| 0.9525652 | 0.0901056 | 0.5534131 |
| 0.8411028 | 0.0885687 | 0.5527472 |
| 0.7186679 | 0.1117453 | 0.3886654 |
| 0.8298382 | 0.1083464 | 0.3874809 |
| 0.0096750 | 0.1908884 | 0.5535087 |
| 0.9934362 | 0.2057853 | 0.3870348 |
| 0.2850469 | 0.2821253 | 0.5547879 |
| 0.1787151 | 0.2938475 | 0.5508887 |
| 0.0471229 | 0.3054963 | 0.3870856 |
| 0.1579623 | 0.3021876 | 0.3889068 |
| 0.1205305 | 0.1917168 | 0.5536063 |
| 0.2162413 | 0.2037106 | 0.3897163 |
| 0.3411510 | 0.1862121 | 0.5569277 |
| 0.3271580 | 0.2083774 | 0.3920896 |
| 0.3800918 | 0.3102767 | 0.3969323 |
| 0.4905925 | 0.3148209 | 0.3978318 |
| 0.4489029 | 0.1793851 | 0.5574469 |
| 0.5490870 | 0.2146651 | 0.3936322 |
| 0.6784950 | 0.1810789 | 0.5535290 |
| 0.6604738 | 0.2129038 | 0.3920273 |
| 0.9569300 | 0.2920098 | 0.5534923 |
| 0.8437460 | 0.2902421 | 0.5540767 |
| 0.7122369 | 0.3143458 | 0.3931063 |
| 0.8247492 | 0.3108545 | 0.3896986 |
| 0.7860471 | 0.1889263 | 0.5536170 |
| 0.8822262 | 0.2092613 | 0.3879333 |
| 0.0139155 | 0.3933355 | 0.5506700 |
| 0.9925094 | 0.4071167 | 0.3872012 |
| 0.1280619 | 0.3985460 | 0.5451049 |
| 0.2115145 | 0.3997454 | 0.3918310 |
| 0.3203656 | 0.4078798 | 0.3986816 |
| 0.5383974 | 0.4195737 | 0.4000015 |
| 0.6526593 | 0.4161216 | 0.3967345 |
| 0.7926028 | 0.3875894 | 0.5532446 |
| 0.8801632 | 0.4104076 | 0.3885736 |
| 0.2829628 | 0.8813987 | 0.5479611 |
| 0.1722167 | 0.8889470 | 0.5510590 |
| 0.0594652 | 0.9015839 | 0.3864023 |
| 0.1736984 | 0.8981732 | 0.3878810 |
| 0.6159822 | 0.8865499 | 0.5460151 |

|            |           |           |
|------------|-----------|-----------|
| 0.5029949  | 0.8839283 | 0.5438388 |
| 0.3909265  | 0.9097153 | 0.3903113 |
| 0.5004353  | 0.9179782 | 0.3902344 |
| 0.9496449  | 0.8900445 | 0.5520065 |
| 0.8390505  | 0.8891486 | 0.5506622 |
| 0.7194913  | 0.9103556 | 0.3872713 |
| 0.8318390  | 0.9071208 | 0.3857661 |
| 0.0035948  | 0.7899680 | 0.5513617 |
| 0.0032609  | 0.8022011 | 0.3861873 |
| 0.2757175  | 0.6745647 | 0.5346559 |
| 0.1666854  | 0.6921753 | 0.5453885 |
| 0.0622700  | 0.7013260 | 0.3875846 |
| 0.1812073  | 0.6942137 | 0.3904822 |
| 0.1143847  | 0.7907616 | 0.5501557 |
| 0.2390510  | 0.7956577 | 0.3902480 |
| 0.3372966  | 0.7761744 | 0.5382112 |
| 0.3543545  | 0.8015567 | 0.3922807 |
| 0.4446262  | 0.7895434 | 0.5362740 |
| 0.4773074  | 0.7294123 | 0.3966560 |
| 0.4728053  | 0.5220853 | 0.4020117 |
| 0.5494455  | 0.8161042 | 0.3927558 |
| 0.6755640  | 0.7948099 | 0.5457474 |
| 0.6611442  | 0.8119504 | 0.3906173 |
| 0.9484633  | 0.6900941 | 0.5510761 |
| 0.8370205  | 0.6876925 | 0.5501235 |
| 0.7138712  | 0.7111442 | 0.3914929 |
| 0.8280019  | 0.7085847 | 0.3878271 |
| 0.7824537  | 0.7889199 | 0.5488119 |
| 0.8884806  | 0.8058806 | 0.3858633 |
| 0.0037557  | 0.5906683 | 0.5509908 |
| 0.9979971  | 0.6064187 | 0.3871264 |
| 0.1121361  | 0.5935695 | 0.5464129 |
| 0.2335428  | 0.5886947 | 0.3936049 |
| 0.2814100  | 0.5588665 | 0.5243475 |
| 0.5300778  | 0.6235181 | 0.3993943 |
| 0.6496540  | 0.6162891 | 0.3962499 |
| 0.7895355  | 0.5877377 | 0.5507379 |
| 0.8838672  | 0.6089053 | 0.3877442 |
| 0.0065017  | 0.9896465 | 0.5531981 |
| -0.0001091 | 0.0032296 | 0.3860668 |
| 0.1178368  | 0.9893657 | 0.5535777 |
| 0.2214901  | 0.0027868 | 0.3880038 |
| 0.3386466  | 0.9827390 | 0.5521188 |
| 0.3317429  | 0.0075718 | 0.3889434 |

|           |           |           |
|-----------|-----------|-----------|
| 0.4494335 | 0.9845944 | 0.5506365 |
| 0.5540737 | 0.0153581 | 0.3890811 |
| 0.6728706 | 0.9874808 | 0.5498437 |
| 0.6650714 | 0.0120727 | 0.3879288 |
| 0.7838819 | 0.9886954 | 0.5510845 |
| 0.8872882 | 0.0067014 | 0.3859183 |
| 0.1801858 | 0.5033912 | 0.5377716 |
| 0.0507227 | 0.5055710 | 0.3875513 |
| 0.1621909 | 0.5014434 | 0.3899455 |
| 0.3563640 | 0.5165253 | 0.4032037 |
| 0.9530924 | 0.4895532 | 0.5514805 |
| 0.8397363 | 0.4882369 | 0.5520986 |
| 0.7088726 | 0.5154001 | 0.3948493 |
| 0.8235322 | 0.5116220 | 0.3900511 |

(13) The structure of intermediate between V2+V12 and V0+V14

106

Direct

|           |           |           |
|-----------|-----------|-----------|
| 0.2941511 | 0.0648342 | 0.5620323 |
| 0.1836048 | 0.0673292 | 0.5607431 |
| 0.0422306 | 0.1235977 | 0.3827627 |
| 0.1535999 | 0.1233950 | 0.3849705 |
| 0.6287803 | 0.0672204 | 0.5564404 |
| 0.5162790 | 0.0654819 | 0.5606267 |
| 0.3752195 | 0.1241606 | 0.3919410 |
| 0.4863792 | 0.1252342 | 0.3922382 |
| 0.9621190 | 0.0677253 | 0.5575645 |
| 0.8507887 | 0.0673068 | 0.5560686 |
| 0.7084667 | 0.1248583 | 0.3872927 |
| 0.8196784 | 0.1242791 | 0.3837351 |
| 0.0177553 | 0.1680168 | 0.5579580 |
| 0.9861991 | 0.2238472 | 0.3830218 |
| 0.2927470 | 0.2612420 | 0.5621176 |
| 0.1860886 | 0.2687420 | 0.5574885 |
| 0.0415077 | 0.3236855 | 0.3833232 |
| 0.1530902 | 0.3237200 | 0.3877286 |
| 0.1288123 | 0.1678494 | 0.5592951 |
| 0.2085947 | 0.2235165 | 0.3889315 |
| 0.3509197 | 0.1665346 | 0.5648654 |
| 0.3197464 | 0.2247971 | 0.3937122 |
| 0.3745294 | 0.3254205 | 0.4015641 |
| 0.4855963 | 0.3258901 | 0.4050313 |

|           |           |           |
|-----------|-----------|-----------|
| 0.4588163 | 0.1583391 | 0.5663469 |
| 0.5412182 | 0.2254066 | 0.3973725 |
| 0.6875817 | 0.1599138 | 0.5594465 |
| 0.6526093 | 0.2248296 | 0.3944188 |
| 0.9628503 | 0.2684599 | 0.5569052 |
| 0.8508417 | 0.2689124 | 0.5582122 |
| 0.7072384 | 0.3250907 | 0.3957895 |
| 0.8183184 | 0.3242762 | 0.3886009 |
| 0.7948987 | 0.1674835 | 0.5580947 |
| 0.8746170 | 0.2243749 | 0.3847205 |
| 0.0182801 | 0.3687681 | 0.5532629 |
| 0.9849137 | 0.4233393 | 0.3818287 |
| 0.1303578 | 0.3701949 | 0.5507617 |
| 0.2079657 | 0.4233424 | 0.3938647 |
| 0.3187509 | 0.4262504 | 0.4054321 |
| 0.5400779 | 0.4268937 | 0.4121264 |
| 0.6513594 | 0.4255161 | 0.4033742 |
| 0.8020221 | 0.3681951 | 0.5576715 |
| 0.8734379 | 0.4240806 | 0.3856405 |
| 0.2948198 | 0.8656969 | 0.5483652 |
| 0.1839971 | 0.8675421 | 0.5527504 |
| 0.0425372 | 0.9228669 | 0.3805672 |
| 0.1540457 | 0.9223974 | 0.3836025 |
| 0.6260307 | 0.8678937 | 0.5384887 |
| 0.5127790 | 0.8688279 | 0.5321024 |
| 0.3765095 | 0.9211061 | 0.3911246 |
| 0.4888616 | 0.9244834 | 0.3938179 |
| 0.9617262 | 0.8675743 | 0.5545217 |
| 0.8504237 | 0.8678967 | 0.5510867 |
| 0.7090059 | 0.9247859 | 0.3807507 |
| 0.8200598 | 0.9240940 | 0.3786976 |
| 0.0173988 | 0.7677768 | 0.5519114 |
| 0.9864224 | 0.8230829 | 0.3787296 |
| 0.2860903 | 0.6827900 | 0.4999504 |
| 0.1840030 | 0.6723554 | 0.5296256 |
| 0.0417935 | 0.7224639 | 0.3809810 |
| 0.1520043 | 0.7210366 | 0.3887747 |
| 0.1287466 | 0.7680728 | 0.5478541 |
| 0.2105901 | 0.8208978 | 0.3871855 |
| 0.3474521 | 0.7723429 | 0.5207579 |
| 0.3197773 | 0.8241826 | 0.3871971 |
| 0.4538297 | 0.7829446 | 0.5014867 |
| 0.5015119 | 0.7363383 | 0.4392158 |
| 0.4844524 | 0.5276096 | 0.4251146 |

|           |           |           |
|-----------|-----------|-----------|
| 0.5471347 | 0.8266332 | 0.4031472 |
| 0.6861268 | 0.7756768 | 0.5387776 |
| 0.6544423 | 0.8246945 | 0.3875668 |
| 0.9615688 | 0.6685041 | 0.5489781 |
| 0.8493539 | 0.6676781 | 0.5491451 |
| 0.7084600 | 0.7240381 | 0.3913517 |
| 0.8188170 | 0.7234301 | 0.3834821 |
| 0.7933460 | 0.7686811 | 0.5467102 |
| 0.8750639 | 0.8233919 | 0.3787683 |
| 0.0178058 | 0.5691664 | 0.5467662 |
| 0.9852485 | 0.6226818 | 0.3805925 |
| 0.1296778 | 0.5702836 | 0.5374590 |
| 0.2039797 | 0.6204117 | 0.4008238 |
| 0.3020766 | 0.6176763 | 0.4374305 |
| 0.5425308 | 0.6283974 | 0.4241416 |
| 0.6510086 | 0.6259365 | 0.4033639 |
| 0.8009944 | 0.5682836 | 0.5517246 |
| 0.8740254 | 0.6231727 | 0.3833829 |
| 0.0172500 | 0.9674827 | 0.5573673 |
| 0.9869848 | 0.0234416 | 0.3808085 |
| 0.1283283 | 0.9670932 | 0.5584548 |
| 0.2093739 | 0.0225818 | 0.3854067 |
| 0.3495809 | 0.9654474 | 0.5559784 |
| 0.3204195 | 0.0230886 | 0.3890361 |
| 0.4602302 | 0.9646780 | 0.5529313 |
| 0.5423430 | 0.0246901 | 0.3890583 |
| 0.6834108 | 0.9671888 | 0.5491583 |
| 0.6536387 | 0.0247470 | 0.3854453 |
| 0.7944750 | 0.9675461 | 0.5520804 |
| 0.8755238 | 0.0240322 | 0.3801246 |
| 0.1771988 | 0.4697533 | 0.5404860 |
| 0.0406069 | 0.5228051 | 0.3804932 |
| 0.1516327 | 0.5221417 | 0.3877352 |
| 0.3711489 | 0.5255619 | 0.4241895 |
| 0.9640143 | 0.4688933 | 0.5515841 |
| 0.8502339 | 0.4684943 | 0.5544340 |
| 0.7065065 | 0.5252341 | 0.3982425 |
| 0.8175206 | 0.5241852 | 0.3880795 |

(14) The structure of the TS between intermediate and V0+V14

106

Direct

|           |           |           |
|-----------|-----------|-----------|
| 0.2978205 | 0.0722672 | 0.5572670 |
| 0.1877282 | 0.0765654 | 0.5527619 |
| 0.0385529 | 0.1160214 | 0.3798255 |
| 0.1501129 | 0.1159495 | 0.3826431 |
| 0.6322326 | 0.0767558 | 0.5602137 |
| 0.5197994 | 0.0734740 | 0.5631526 |
| 0.3713365 | 0.1150417 | 0.3939112 |
| 0.4823875 | 0.1159383 | 0.3966536 |
| 0.9660536 | 0.0783697 | 0.5516438 |
| 0.8547310 | 0.0780870 | 0.5539071 |
| 0.7039447 | 0.1161107 | 0.3895325 |
| 0.8152622 | 0.1160890 | 0.3842130 |
| 0.0219887 | 0.1785070 | 0.5524175 |
| 0.9828158 | 0.2160309 | 0.3823634 |
| 0.2965983 | 0.2695067 | 0.5585943 |
| 0.1904804 | 0.2784915 | 0.5529506 |
| 0.0389741 | 0.3159059 | 0.3830654 |
| 0.1505910 | 0.3162529 | 0.3866880 |
| 0.1329607 | 0.1775927 | 0.5528089 |
| 0.2056937 | 0.2160314 | 0.3880880 |
| 0.3542448 | 0.1742696 | 0.5620777 |
| 0.3166032 | 0.2163549 | 0.3941766 |
| 0.3714753 | 0.3173905 | 0.4033896 |
| 0.4826431 | 0.3178504 | 0.4080204 |
| 0.4617575 | 0.1664076 | 0.5660988 |
| 0.5378028 | 0.2169940 | 0.4007414 |
| 0.6911579 | 0.1703221 | 0.5605136 |
| 0.6489989 | 0.2162670 | 0.3974009 |
| 0.9670486 | 0.2794102 | 0.5537705 |
| 0.8547180 | 0.2797773 | 0.5565519 |
| 0.7043509 | 0.3166419 | 0.3986737 |
| 0.8153609 | 0.3160940 | 0.3904629 |
| 0.7983004 | 0.1781455 | 0.5573165 |
| 0.8710646 | 0.2161239 | 0.3852081 |
| 0.0225080 | 0.3792993 | 0.5505000 |
| 0.9827052 | 0.4155607 | 0.3820633 |
| 0.1351079 | 0.3809506 | 0.5472142 |
| 0.2063848 | 0.4163668 | 0.3916598 |
| 0.3163050 | 0.4185846 | 0.4056164 |
| 0.5376237 | 0.4191423 | 0.4163346 |
| 0.6490258 | 0.4169599 | 0.4073726 |
| 0.8066272 | 0.3792402 | 0.5570323 |
| 0.8711764 | 0.4158625 | 0.3869542 |
| 0.2988901 | 0.8729060 | 0.5407879 |

|           |           |           |
|-----------|-----------|-----------|
| 0.1879011 | 0.8777164 | 0.5399052 |
| 0.0371974 | 0.9160582 | 0.3728580 |
| 0.1481318 | 0.9164488 | 0.3760836 |
| 0.6314851 | 0.8766023 | 0.5486800 |
| 0.5203413 | 0.8738742 | 0.5440369 |
| 0.3692348 | 0.9117707 | 0.4028868 |
| 0.4823707 | 0.9138905 | 0.4045219 |
| 0.9649128 | 0.8786957 | 0.5461030 |
| 0.8542840 | 0.8787720 | 0.5488433 |
| 0.7048577 | 0.9161755 | 0.3835769 |
| 0.8156515 | 0.9160189 | 0.3782697 |
| 0.0199673 | 0.7786278 | 0.5415088 |
| 0.9818087 | 0.8154202 | 0.3728599 |
| 0.3179200 | 0.7223154 | 0.4565856 |
| 0.1859897 | 0.6834173 | 0.5230502 |
| 0.0375213 | 0.7147007 | 0.3745627 |
| 0.1471892 | 0.7145600 | 0.3816333 |
| 0.1306131 | 0.7783020 | 0.5340801 |
| 0.2009590 | 0.8160765 | 0.3841051 |
| 0.3590770 | 0.7783214 | 0.5169379 |
| 0.3033867 | 0.8154118 | 0.4094418 |
| 0.4659663 | 0.7810257 | 0.5151633 |
| 0.5100117 | 0.7287777 | 0.4530973 |
| 0.4829768 | 0.5204134 | 0.4299276 |
| 0.5456116 | 0.8175832 | 0.4125812 |
| 0.6910388 | 0.7839192 | 0.5457758 |
| 0.6513977 | 0.8159763 | 0.3925424 |
| 0.9661699 | 0.6786823 | 0.5434726 |
| 0.8538961 | 0.6774521 | 0.5475913 |
| 0.7065115 | 0.7156246 | 0.3954837 |
| 0.8157786 | 0.7151140 | 0.3838065 |
| 0.7979209 | 0.7785361 | 0.5475554 |
| 0.8709322 | 0.8154136 | 0.3766430 |
| 0.0231128 | 0.5800422 | 0.5430436 |
| 0.9820089 | 0.6144612 | 0.3770059 |
| 0.1365091 | 0.5820756 | 0.5333416 |
| 0.2039682 | 0.6149771 | 0.3915892 |
| 0.3045910 | 0.6157540 | 0.4241347 |
| 0.5444167 | 0.6197026 | 0.4337934 |
| 0.6505957 | 0.6170289 | 0.4093512 |
| 0.8055675 | 0.5790400 | 0.5518595 |
| 0.8712537 | 0.6148581 | 0.3826981 |
| 0.0209494 | 0.9780507 | 0.5479168 |
| 0.9822431 | 0.0163673 | 0.3763580 |



|           |           |           |
|-----------|-----------|-----------|
| 0.1325051 | 0.9767397 | 0.5472173 |
| 0.2050718 | 0.0153854 | 0.3827936 |
| 0.3533282 | 0.9717141 | 0.5536383 |
| 0.3161383 | 0.0134066 | 0.3911646 |
| 0.4647806 | 0.9711402 | 0.5564132 |
| 0.5370989 | 0.0148349 | 0.3954285 |
| 0.6878038 | 0.9771729 | 0.5547352 |
| 0.6485242 | 0.0157443 | 0.3891904 |
| 0.7986137 | 0.9782358 | 0.5527628 |
| 0.8709722 | 0.0163453 | 0.3785986 |
| 0.1824972 | 0.4794571 | 0.5369853 |
| 0.0386670 | 0.5150799 | 0.3786638 |
| 0.1503684 | 0.5152002 | 0.3837225 |
| 0.3684460 | 0.5197956 | 0.4237347 |
| 0.9690122 | 0.4798241 | 0.5492999 |
| 0.8551656 | 0.4791671 | 0.5534599 |
| 0.7048673 | 0.5164159 | 0.4017642 |
| 0.8152694 | 0.5156682 | 0.3895778 |

(15) The structure of V0+V14

106

Direct

|            |           |           |
|------------|-----------|-----------|
| 0.2732741  | 0.1037442 | 0.5510956 |
| 0.1626835  | 0.1015961 | 0.5512797 |
| 0.0555083  | 0.0997324 | 0.3892582 |
| 0.1667527  | 0.0996409 | 0.3893362 |
| 0.6076325  | 0.0920142 | 0.5504283 |
| 0.4960489  | 0.0965595 | 0.5505920 |
| 0.3888101  | 0.0997967 | 0.3895098 |
| 0.5000649  | 0.0999546 | 0.3895182 |
| 0.9401096  | 0.0971523 | 0.5513226 |
| 0.8280000  | 0.0942593 | 0.5510404 |
| 0.7221342  | 0.0999606 | 0.3892216 |
| 0.8333476  | 0.0998294 | 0.3892283 |
| -0.0038994 | 0.1987359 | 0.5515915 |
| -0.0000029 | 0.1997761 | 0.3896319 |
| 0.2732705  | 0.2962290 | 0.5514966 |
| 0.1660619  | 0.3002166 | 0.5516923 |
| 0.0554564  | 0.2997606 | 0.3898758 |
| 0.1666568  | 0.2996672 | 0.3902701 |
| 0.1070325  | 0.2003859 | 0.5516312 |
| 0.2221693  | 0.1996625 | 0.3899450 |
| 0.3329943  | 0.2037842 | 0.5512749 |

|            |           |           |
|------------|-----------|-----------|
| 0.3333703  | 0.1997365 | 0.3903533 |
| 0.3887445  | 0.2997438 | 0.3918965 |
| 0.4999563  | 0.2999165 | 0.3923860 |
| 0.4406846  | 0.1916168 | 0.5508111 |
| 0.5554565  | 0.1999841 | 0.3907108 |
| 0.6672237  | 0.1855635 | 0.5501207 |
| 0.6666570  | 0.1999969 | 0.3904278 |
| 0.9428022  | 0.2994988 | 0.5516359 |
| 0.8303888  | 0.2987284 | 0.5512572 |
| 0.7220923  | 0.3000233 | 0.3910398 |
| 0.8333224  | 0.2998807 | 0.3901621 |
| 0.7736367  | 0.1960067 | 0.5509207 |
| 0.8887905  | 0.1998850 | 0.3897671 |
| 0.0004786  | 0.3995703 | 0.5516515 |
| -0.0000270 | 0.3997938 | 0.3897384 |
| 0.1122993  | 0.4017567 | 0.5516230 |
| 0.2220305  | 0.3996389 | 0.3911172 |
| 0.3332697  | 0.3996869 | 0.3925000 |
| 0.5553607  | 0.3999682 | 0.3932412 |
| 0.6666516  | 0.4000215 | 0.3923193 |
| 0.7851690  | 0.3993870 | 0.5508784 |
| 0.8887051  | 0.3999013 | 0.3898839 |
| 0.2788948  | 0.9064050 | 0.5508125 |
| 0.1682647  | 0.9019938 | 0.5509310 |
| 0.0555697  | 0.8997801 | 0.3886722 |
| 0.1667839  | 0.8996807 | 0.3887057 |
| 0.5924334  | 0.8836416 | 0.5507309 |
| 0.4734316  | 0.8883986 | 0.5507119 |
| 0.3888396  | 0.8998200 | 0.3886415 |
| 0.5000289  | 0.8999960 | 0.3887512 |
| 0.9430874  | 0.8972293 | 0.5509534 |
| 0.8303127  | 0.8954678 | 0.5507479 |
| 0.7221613  | 0.8999926 | 0.3885534 |
| 0.8333537  | 0.8998971 | 0.3885534 |
| 0.0030959  | 0.7990735 | 0.5509922 |
| 0.0000818  | 0.7997495 | 0.3886347 |
| 0.2958846  | 0.7222127 | 0.5511995 |
| 0.1822324  | 0.7058988 | 0.5512038 |
| 0.0554797  | 0.6997433 | 0.3888978 |
| 0.1667304  | 0.6996618 | 0.3892890 |
| 0.1164155  | 0.8007519 | 0.5510859 |
| 0.2222130  | 0.7996911 | 0.3888624 |
| 0.3543458  | 0.8189596 | 0.5509846 |
| 0.3334039  | 0.7998112 | 0.3889921 |

|            |            |           |
|------------|------------|-----------|
| 0.3887205  | 0.6998236  | 0.3904322 |
| 0.4999581  | 0.7000536  | 0.3909449 |
| 0.4999249  | 0.5000007  | 0.3934399 |
| 0.5554362  | 0.8000389  | 0.3894554 |
| 0.6629556  | 0.7978297  | 0.5503979 |
| 0.6666702  | 0.8000303  | 0.3892343 |
| 0.9480532  | 0.6995898  | 0.5511005 |
| 0.8340286  | 0.6974378  | 0.5507869 |
| 0.7220600  | 0.7000412  | 0.3899513 |
| 0.8333377  | 0.6999170  | 0.3891269 |
| 0.7725167  | 0.7960354  | 0.5506231 |
| 0.8888267  | 0.7998199  | 0.3885860 |
| 0.0067619  | 0.6015607  | 0.5513261 |
| -0.0000199 | 0.5997726  | 0.3891556 |
| 0.1224681  | 0.6037185  | 0.5513629 |
| 0.2220632  | 0.5996796  | 0.3904118 |
| 0.3332610  | 0.5997935  | 0.3916201 |
| 0.5553505  | 0.6000601  | 0.3924485 |
| 0.6666257  | 0.6000754  | 0.3916838 |
| 0.7869270  | 0.5981827  | 0.5505758 |
| 0.8887309  | 0.5998648  | 0.3892868 |
| -0.0025285 | 0.9982880  | 0.5511121 |
| 0.0001307  | -0.0002395 | 0.3888383 |
| 0.1092421  | 0.0004185  | 0.5510717 |
| 0.2222044  | -0.0003186 | 0.3889158 |
| 0.3280292  | 0.0071332  | 0.5507095 |
| 0.3334344  | -0.0002196 | 0.3888903 |
| 0.4377130  | 0.9965145  | 0.5506581 |
| 0.5554679  | 0.0000128  | 0.3887756 |
| 0.6565605  | -0.0118247 | 0.5506564 |
| 0.6667357  | 0.0000158  | 0.3886994 |
| 0.7703855  | 0.9927808  | 0.5507878 |
| 0.8888157  | -0.0001673 | 0.3887289 |
| 0.1636465  | 0.5005403  | 0.5512021 |
| 0.0553808  | 0.4997567  | 0.3896153 |
| 0.1666309  | 0.4996819  | 0.3904659 |
| 0.3886666  | 0.4997919  | 0.3930384 |
| 0.9501085  | 0.5011095  | 0.5514367 |
| 0.8361216  | 0.4989237  | 0.5510479 |
| 0.7220499  | 0.5000594  | 0.3915191 |
| 0.8332822  | 0.4999217  | 0.3900737 |

**3. The total energy table of the configurations in Fig. 3 and Fig. 4.**

**Table 1.** Table Title The total energies of the vacancy migration processes in Fig. 3

| Structures     | Relative energy (eV) |           |
|----------------|----------------------|-----------|
|                | GGA-PBE (eV)         | DFTB (eV) |
| Initial 1      | 0.00                 | 0.00      |
| TS1            | 7.33                 | 5.51      |
| Final 1        | 0.00                 | 0.00      |
| Initial 2      | 0.00                 | 0.00      |
| Intermediate 2 | -2.13                | -1.53     |
| TS2            | 1.73                 | 2.71      |
| Final 2        | -8.14                | -7.20     |
| Initial 3      | 0.00                 | 0.00      |
| TS3            | 3.66                 | 3.95      |
| Final 3        | -7.19                | -5.65     |

**Table 2.** The total energies of the evolution of two holes in bilayer graphene (BLG) by interlayer atomic migration in Fig. 4

| Structures   | Relative energy (eV) |           |
|--------------|----------------------|-----------|
|              | GGA-PBE (eV)         | DFTB (eV) |
| V6+V8        | 14.08                | 14.31     |
| TS           | 14.25                | 14.40     |
| Intermediate | 10.45                | 9.31      |
| TS           | 13.16                | 9.79      |
| V5+V9        | 12.62                | 13.40     |
| TS           | 12.84                | 12.92     |
| Intermediate | 9.54                 | 8.65      |
| TS           | 11.24                | 14.07     |
| V3+V11       | 8.48                 | 8.60      |
| TS           | 11.79                | 10.12     |
| V2+V12       | 6.44                 | 5.79      |
| TS           | 6.99                 | 5.91      |
| Intermediate | 3.40                 | 0.55      |
| TS           | 4.71                 | 2.08      |
| V0+V14       | 0.00                 | 0.00      |
